1  
2  
3  
4  
5  
6  
7  
8  
9  
10  
11  
12  
13  
14  
15  
16  
17  
18  
19  
20  
21  
22  
23  
24  
25  
26  
27  
28  
29  
30  
31  
32  
33

**Human genetic analyses of organelles highlight the nucleus, but not the mitochondrion, in age-related trait heritability**

Rahul Gupta<sup>1,2,3</sup>, Konrad J. Karczewski<sup>2,3</sup>, Daniel Howrigan<sup>2,3</sup>, Benjamin M. Neale<sup>2,3,\*</sup>, Vamsi K. Mootha<sup>1,2,\*</sup>

<sup>1</sup> Howard Hughes Medical Institute and Department of Molecular Biology, Massachusetts General Hospital, Boston, MA 02114

<sup>2</sup> Broad Institute of MIT and Harvard, Cambridge, MA 02142

<sup>3</sup> Analytic and Translational Genetics Unit, Center for Genomic Medicine, Massachusetts General Hospital, Boston, MA 02114, USA

\*Corresponding authors: [bneale@broadinstitute.org](mailto:bneale@broadinstitute.org) (B.M.N.), [vamsi@hms.harvard.edu](mailto:vamsi@hms.harvard.edu) (V.K.M.)

Keywords: mitochondria, nucleus, aging, oxidative phosphorylation, OXPHOS, transcription factor, zinc finger, KRAB domain, gene regulation, UK Biobank, constraint, dominance, haplosufficiency, haplosufficient, PPARGC1A, ESRRA, TFAM

34 **Abstract**

35 Most age-related human diseases are accompanied by a decline in cellular organelle integrity, including  
36 impaired lysosomal proteostasis and defective mitochondrial oxidative phosphorylation. An open  
37 question, however, is the degree to which inherited variation impacting each organelle contributes to age-  
38 related disease pathogenesis. Here, we evaluate if organelle-relevant loci confer greater-than-expected  
39 age-related disease risk. As mitochondrial dysfunction is a “hallmark” of aging, we begin by assessing  
40 nuclear and mitochondrial DNA loci relevant to mitochondria and surprisingly observe a lack of  
41 enrichment across 24 age-related traits. Within nine other organelles, we find no enrichment with one  
42 exception: the nucleus, where enrichment emanates from nuclear transcription factors. In agreement, we  
43 find that genes encoding several organelles tend to be “haplosufficient,” while we observe strong  
44 purifying selection against protein-truncating variants impacting the nucleus. Our work identifies common  
45 variation near transcription factors as having outsize influence on age-related trait risk, motivating future  
46 efforts to determine if and how this variation contributes to age-related organelle deterioration.

47

## 48 **Introduction**

49 The global burden of age-related diseases such as type 2 diabetes (T2D), Parkinson's disease (PD), and  
50 cardiovascular disease (CVD) has been steadily rising due in part to a progressively aging population. These  
51 diseases are often highly heritable<sup>1</sup>. Genome-wide association studies (GWAS) have led to the discovery  
52 of thousands of robust associations with common genetic variants<sup>2</sup>, implicating a complex genetic  
53 architecture as underlying much of the heritable risk. These loci hold the potential to reveal underlying  
54 mechanisms of disease and spotlight targetable pathways.

55 Aging has been associated with dysfunction in many cellular organelles<sup>3</sup>. Dysregulation of autophagic  
56 proteostasis, for which the lysosome is central, has been implicated in myriad age-related disorders  
57 including neurodegeneration, heart disease, and aging itself<sup>4</sup>, and mouse models deficient for autophagy  
58 in the central nervous system show neurodegeneration<sup>5,6</sup>. Endoplasmic reticular (ER) stress has been  
59 invoked as central to metabolic syndrome and insulin resistance in type 2 diabetes<sup>7</sup>. Disruption in the  
60 nucleus through increased gene regulatory noise from epigenetic alterations<sup>3</sup> and elevated nuclear  
61 envelope "leakiness"<sup>8</sup> has been implicated in aging. Dysfunction in the mitochondria has even been  
62 invoked as a "hallmark" of aging<sup>3</sup> and has been nominated as a driver of virtually all common age-  
63 associated diseases. In particular, deficits in mitochondrial oxidative phosphorylation (OXPHOS) have  
64 been observed in aging and age-related diseases as evidenced by *in vivo* <sup>31</sup>P-NMR measures<sup>9,10</sup>, enzymatic  
65 activity<sup>11-17</sup> in biopsy material, accumulation of somatic mitochondrial DNA (mtDNA) mutations<sup>18-20</sup>, and  
66 a decline in mtDNA copy number (mtCN)<sup>21</sup>.

67 Given that a decline in organelle function is observed in age-related disease, a natural question is whether  
68 inherited variation in loci relevant for organelles are enriched for age-related disease risk. In the present  
69 study, we use a human genetics approach to assess common variation in loci relevant to the function of  
70 10 cellular organelles. We begin with a deliberate focus on mitochondria given the depth of literature  
71 linking it to age-related disease. As mitochondria-localizing protein products from ~1100 nuclear DNA  
72 (nucDNA)-encoded genes<sup>22</sup> and 13 mtDNA-encoded genes are critical for proper OXPHOS homeostasis<sup>23</sup>,  
73 we test both nucDNA and mtDNA loci relevant for mitochondrial function in 24 different age-related  
74 diseases and traits. We hypothesized that heritability for common, age-related traits would be  
75 overrepresented among mitochondria-relevant loci, namely variants near genes encoding the organelle's  
76 proteome or loci associated with quantitative readouts of mitochondrial function.

77 To our surprise, we find no evidence of enrichment for genome-wide association signal in mitochondria-  
78 relevant loci across any of our analyses. Further, of ten tested organelles, only the nucleus shows  
79 enrichment among many age-associated traits, with the signal emanating from the transcription factors.  
80 Further analysis shows that genes encoding the mitochondrial proteome tend to be tolerant to  
81 heterozygous predicted loss-of-function (pLoF) variation and thus are surprisingly "haplosufficient,"  
82 whereas nuclear transcription factors are especially sensitive to gene dosage and are often  
83 "haploinsufficient". Thus, we highlight variation influencing gene-regulatory pathways, rather than  
84 organelle physiology, in the inherited risk of common age-associated diseases.

## 85 **Results**

### 86 **Age-related diseases and traits show diverse genetic architectures**

87 To systematically define age-related diseases, we turned to recently published epidemiological data from  
88 the United Kingdom (U.K.)<sup>24</sup> in order to match the U.K. Biobank (UKB)<sup>25</sup> cohort. We prioritized traits whose  
89 prevalence increased as a function of age (**Methods**) and were represented in UKB  
90 ([https://github.com/Nealelab/UK\\_Biobank\\_GWAS](https://github.com/Nealelab/UK_Biobank_GWAS)) and/or had available published GWAS meta-  
91 analyses<sup>26-35</sup> (**Figure 1A, Supplementary note**). We used SNP heritability estimates from stratified linkage  
92 disequilibrium score regression (S-LDSC, <https://github.com/bulik/ldsc>)<sup>36</sup> to ensure that our selected traits  
93 were sufficiently heritable (**Methods, Supplementary note**). We then computed pairwise genetic

94 correlations between the age-associated traits to compare their respective genetic architectures (**Figure**  
 95 **1B**, **Table S2**, **Methods**). As expected we find a highly correlated module of primarily cardiometabolic  
 96 traits with high density lipoprotein (HDL) showing anti-correlation<sup>37</sup>. Interestingly, several other traits  
 97 (gastroesophageal reflux disease (GERD), osteoarthritis) showed moderate correlation to the  
 98 cardiometabolic trait cluster while atrial fibrillation, for which T2D and CVD are risk factors<sup>38</sup>, did not. Our  
 99 final set of prioritized, age-associated traits included 24 genetically diverse, heritable phenotypes (**Table**  
 100 **S1**). Of these, 11 traits were sufficiently heritable only in UKB, 3 were sufficiently heritable only among  
 101 non-UKB meta-analyses, and 10 were well-powered in both UKB and an independent cohort.

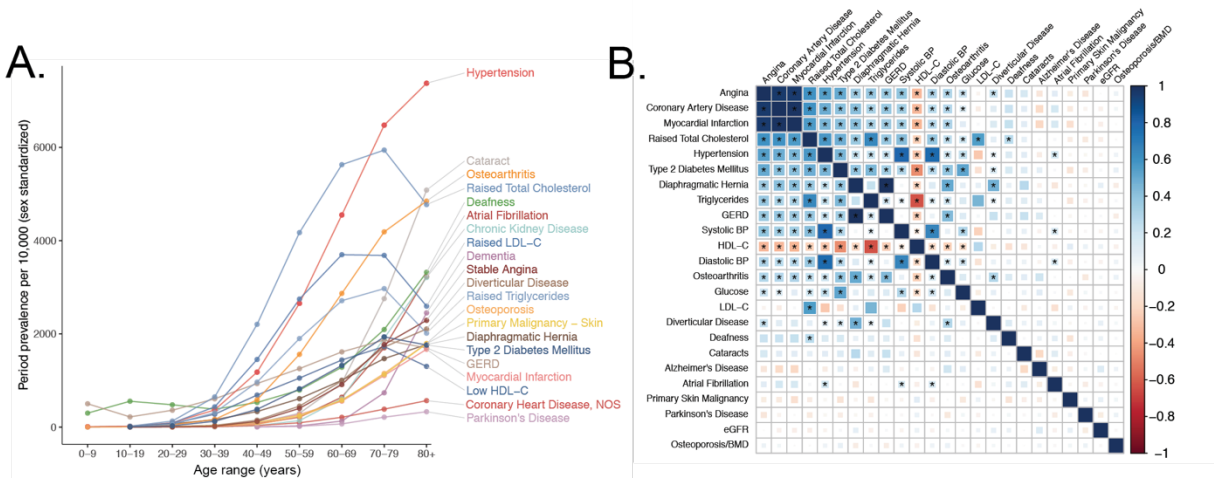

**Figure 1.** Selection of genetically diverse age-related diseases and traits using epidemiological data. **A.** Period prevalence of age-associated diseases systematically selected for this study (**Methods**). Epidemiological data obtained from Kuan et al. 2019. **B:** Genetic correlation between the selected age-related traits. All correlations were assessed between UK Biobank phenotypes with the exception of eGFR, Alzheimer's Disease, and Parkinson's Disease, for which the respective meta-analyses were used (**Methods**). Point estimates and standard errors reported in **Table S2**. \* represent genetic correlations that are significantly different from 0 at a Bonferroni-corrected threshold for  $p = 0.05 \times 24$  traits.

102

### 103 **No evidence for enrichment of age-related trait heritability in mitochondria-relevant loci**

104 To test if age-related trait heritability was enriched among mitochondria-relevant loci, we began by simply  
 105 asking if ~1100 nucDNA genes encoding the mitochondrial proteome from the MitoCarta2.0 inventory<sup>22</sup>  
 106 were found near lead SNPs for our selected traits represented in the NHGRI-EBI GWAS Catalog  
 107 (<https://www.ebi.ac.uk/gwas/>)<sup>39</sup> more frequently than expectation (**Methods, Supplementary note**). To  
 108 our surprise, no traits showed a statistically significant enrichment of mitochondrial genes (**Figure S1A**);  
 109 in fact, six traits showed a statistically significant depletion. Even more strikingly, MitoCarta genes tended  
 110 to be nominally enriched in fewer traits than the average randomly selected sample of protein-coding  
 111 genes (**Figure S1B**, empirical  $p = 0.014$ ). This lack of enrichment was observed more broadly across  
 112 virtually all traits represented in the GWAS Catalog (**Figure S1C**). We also tested several transcriptional  
 113 regulators of mitochondrial biogenesis and function – *TFAM*, *GABPA*, *GABPB1*, *ESRRA*, *YY1*, *NRF1*,  
 114 *PPARGC1A*, *PPARGC1B*. We found little evidence supporting a role for these genes in modifying risk for  
 115 the age-related GWAS Catalog phenotypes, observing only a single trait (heel bone mineral density) for  
 116 which a mitochondrial transcriptional regulator (*TFAM*) was nearest an associated genome-wide  
 117 significant variant (**Supplementary note**).

118 To investigate further, we turned to U.K. Biobank (UKB). We compiled and tested three classes of  
 119 “mitochondria-relevant loci” (**Figure 2A**) with which we interrogated the association between common  
 120 mitochondrial variation and common disease. First, we curated literature-reported nucDNA quantitative  
 121 trait loci (QTLs) associated with measures of mitochondrial function (**Table S3**): mtCN<sup>40,41</sup>, mtRNA

122 abundance and modification<sup>42,43</sup>, and plasma levels of OXPHOS dysfunction biomarkers including GDF15  
 123 protein<sup>44,45</sup>, lactate, pyruvate, and lactate/pyruvate ratio<sup>46–48</sup>. Second, we considered all common variants  
 124 in or near nucDNA MitoCarta genes, as well as two subsets of MitoCarta: mitochondrial Mendelian disease  
 125 genes<sup>49</sup> and nucDNA-encoded OXPHOS genes. Third, we obtained mtDNA genotypes at up to 213 loci after  
 126 quality control (**Methods**) from 360,662 individuals.

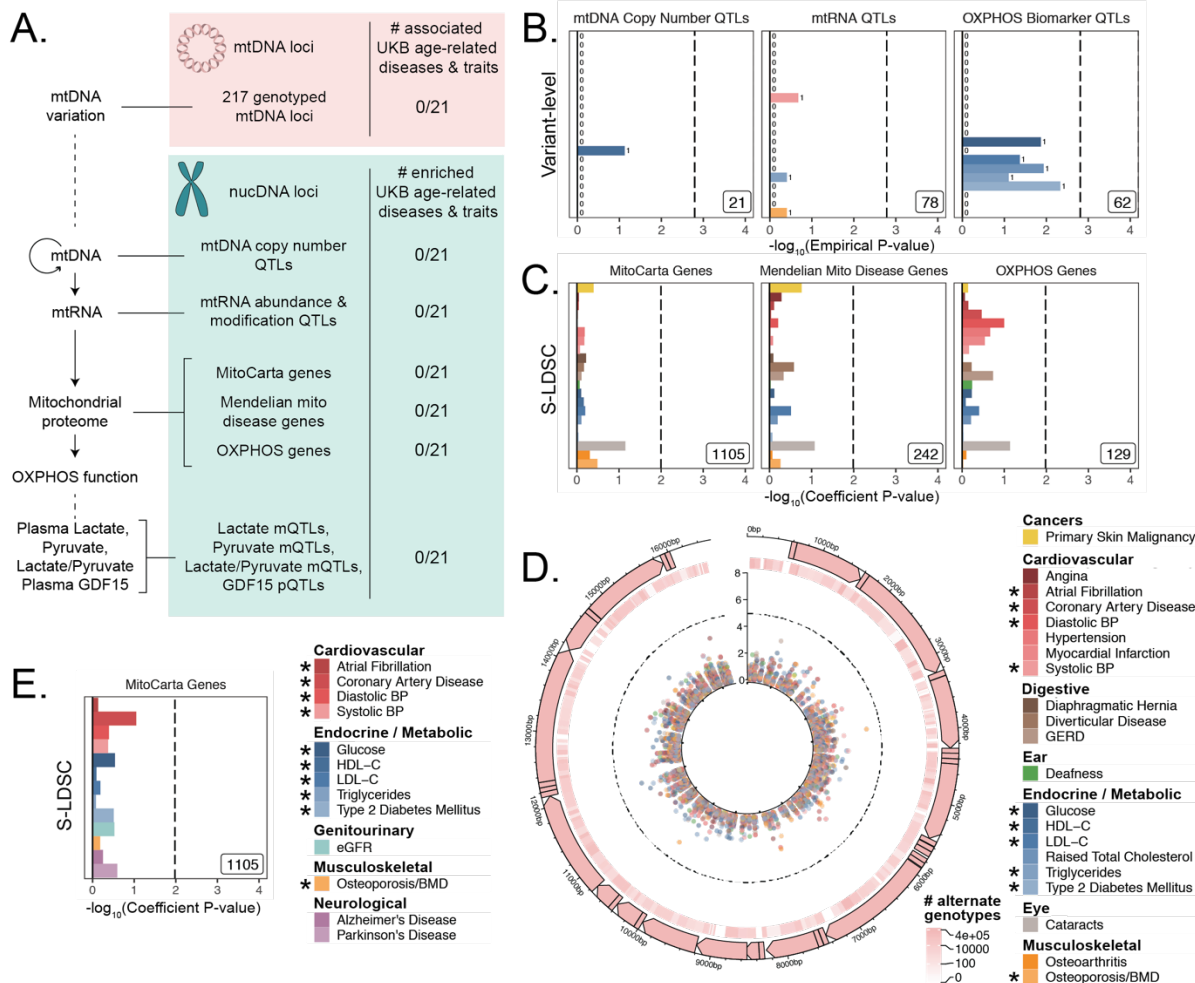

**Figure 2.** Assessment of the association of nucDNA and mtDNA mitochondria-relevant loci to age-related traits. **A.** Scheme outlining the aspects of mitochondrial function assessed in this study. nucDNA loci relevant to mitochondrial function are shown in teal, while mtDNA loci are shown in pink. **B.** Enrichment results for the overlap between loci associated with mtDNA copy number, mtRNA abundance/modification, and OXPHOS biomarkers and loci significantly associated with age-related disease in UKB. Inset number represents the number of tested SNPs, numbers adjacent to bars represent the absolute number of mitochondria-relevant loci overlapping the respective age-related disease. Dotted line represents Bonferroni cutoff for  $p = 0.1$ ; BH FDR 0.1 threshold cannot be visualized as no tests pass the cutoff (**Supplementary note**). **C.** S-LDSC enrichment p-values on top of the baseline model in UKB. Inset labels represent gene-set size; dotted line represents BH FDR 0.1 threshold. **D.** Visualization of mtDNA variants and associations with age-related diseases. The outer-most track represents the genetic architecture of the circular mtDNA. The heatmap track represents the number of individuals with alternate genotype on log scale. The inner track represents mitochondrial genome-wide association p-values, with radial angle corresponding to position on the mtDNA and magnitude representing  $-\log_{10}$  P-value. Dotted line represents Bonferroni cutoff for all tested trait-variant pairs. **E.** Replication of S-LDSC enrichment results in meta-analyses. Dotted line represents BH FDR 0.1 threshold. \* represent traits for which sufficiently well powered cohorts from both UKB and meta-analyses were available. The trait color legend to the right of panel **D** applies to panels **B**, **C**, and **D**, representing UKB traits.

127

128 First, we tested if published QTLs for mtCN, mtRNA abundance, and OXPHOS biomarkers (**Table S3, S4**)  
129 were enriched for an overlap with genome-wide significant loci for each of our age-related traits in UKB  
130 (**Methods, Figure S2**). We observed no evidence of enrichment among QTLs available in the literature  
131 (**Figure 2B, Supplementary note**; all  $q > 0.1$ ).

132 Second, we used S-LDSC<sup>36,50</sup> and MAGMA (<https://ctg.cncr.nl/software/magma>)<sup>51</sup>, two robust methods  
133 that can be used to assess gene-based heritability enrichment accounting for LD and several confounders,  
134 to test if there was any evidence of heritability enrichment among MitoCarta genes (**Methods**). We found  
135 no evidence of enrichment near nucDNA MitoCarta genes for any trait tested in UKB using S-LDSC (**Figure**  
136 **2C, S8A**), consistent with our results from the GWAS Catalog. We replicated this lack of enrichment using  
137 MAGMA at two different window sizes (**Figure S8C, S8E**; all  $q > 0.1$ ).

138 Given the lack of enrichment among the MitoCarta genes, we wanted to (1) verify that our selected  
139 methods could detect previously reported enrichments and (2) confirm that common variation in or near  
140 MitoCarta genes can lead to expression-level perturbations. We first successfully replicated previously  
141 reported enrichment among tissue-specific genes for key traits using both S-LDSC (**Figure S3, S4**) and  
142 MAGMA (**Figure S5, S6, Supplementary note, Methods**). We next confirmed that we had sufficient power  
143 using both S-LDSC and MAGMA to detect physiologically relevant enrichment effect sizes among  
144 MitoCarta genes (**Figure S7, Methods, Supplementary note**). We finally examined the landscape of cis-  
145 expression QTLs (eQTLs) for these genes and found that almost all MitoCarta genes have cis-eQTLs in at  
146 least one tissue and often have cis-eQTLs in more tissues than most protein-coding genes (**Figure S9,**  
147 **Methods, Supplementary note**). Hence, our selected methods could detect physiologically relevant  
148 heritability enrichments among our selected traits at gene-set sizes comparable to that of MitoCarta, and  
149 common variants in or near MitoCarta genes exerted *cis*-control on gene expression.

150 Third, we considered mtDNA loci genotyped in UKB, obtaining calls for up to 213 common variants passing  
151 quality control across 360,662 individuals (**Methods, Supplementary note**). We found no significant  
152 associations on the mtDNA for any of the 21 age-related traits available in UKB using linear or logistic  
153 regression (**Methods, Figure 2E, S9**).

154 As a control and to validate our approach, we also performed mtDNA-GWAS for specific traits with  
155 previously reported associations. A recent analysis of ~147,437 individuals in BioBank Japan revealed four  
156 distinct traits with significant mtDNA associations<sup>52</sup>. Of these, creatinine and aspartate aminotransferase  
157 (AST) had sufficiently large sample sizes in UKB. We observed a large number of associations throughout  
158 the mtDNA for both traits ( $p < 1.15 * 10^{-5}$ , **Figure S9E**). Thus, our mtDNA association method was able to  
159 replicate robust mtDNA associations among well-powered traits.

160 Finally, we sought to replicate our negative results in an independent cohort. We turned to published  
161 GWAS meta-analyses<sup>26-35</sup> (**Table S1**) and successfully replicated the lack of enrichment for MitoCarta  
162 genes across all 10 traits with an available independent cohort GWAS using S-LDSC (**Figure 2E, S8B**) and  
163 MAGMA at two different window sizes (**Figure S8D, Supplementary note**; all  $q > 0.1$ ). Importantly, while  
164 we were unable to pursue analyses for PD and Alzheimer's disease in UKB due to limited case counts, we  
165 tested MitoCarta genes among well-powered meta-analyses for these disorders (**Supplementary note**)  
166 and observed no enrichment (**Figure 2E**; all  $q > 0.1$ ).

167 In summary, we tested (1) QTLs for mitochondrial physiology in UKB, (2) nucDNA loci near genes that  
168 encode the mitochondrial proteome in the GWAS Catalog, UKB, and GWAS meta-analyses, (3) mtDNA  
169 variants in UKB, and (4) known transcriptional regulators of mitochondrial biogenesis and function in the  
170 GWAS Catalog. We found no convincing evidence of heritability enrichment for common age-associated  
171 diseases among these mitochondria-relevant loci (**Table S8**).

172 **Enrichment of age-related trait heritability near genes encoding nuclear transcription factors**

173 We next asked whether heritability for age-related diseases and traits clusters among loci associated with  
 174 any cellular organelle. We used the COMPARTMENTS database (<https://compartments.jensenlab.org>) to  
 175 define gene-sets corresponding to the proteomes of nine additional organelles<sup>53</sup> besides mitochondria  
 176 (**Methods**). We used S-LDSC to produce heritability estimates for these categories in the UKB age-related  
 177 disease traits, finding evidence of heritability enrichment in many traits for genes comprising the nuclear  
 178 proteome (**Figure 3A, Methods**). No other tested organelles showed evidence of heritability enrichment.  
 179 Variation in or near genes comprising the nuclear proteome explained over 50% of disease heritability on  
 180 average despite representing only ~35% of tested SNPs (**Figure S10, Supplementary note**). We  
 181 successfully replicated this pattern of heritability enrichment among organelles using MAGMA in UKB at  
 182 two window sizes (**Figure S13A, S13B**), again finding only enrichment among genes related to the nucleus.

183 With over 6,000 genes comprising the nuclear proteome, we considered largely disjoint subsets of the  
 184 organelle's proteome to trace the source of the enrichment signal<sup>54–56</sup> (**Figure 3B, Methods,**  
 185 **Supplementary note**). We found significant heritability enrichment within the set of 1,804 genes whose  
 186 protein products are annotated to localize to the chromosome itself ( $q < 0.1$  for 9 traits, **Figure 3C, S12**).  
 187 Further partitioning revealed that much of this signal is attributable to the subset classified as  
 188 transcription factors<sup>56</sup> (1,523 genes,  $q < 0.1$  for 10 traits, **Figure 3D, S12**). We replicated these results using  
 189 MAGMA in UKB at two window sizes (**Figure S13**), and also replicated enrichments among TFs in several  
 190 (but not all) corresponding meta-analyses (**Figure S14**) despite reduced power (**Figure S7H**). We generated  
 191 functional subdivisions of the TFs (**Methods, Supplementary note**), finding that the non-zinc finger TFs

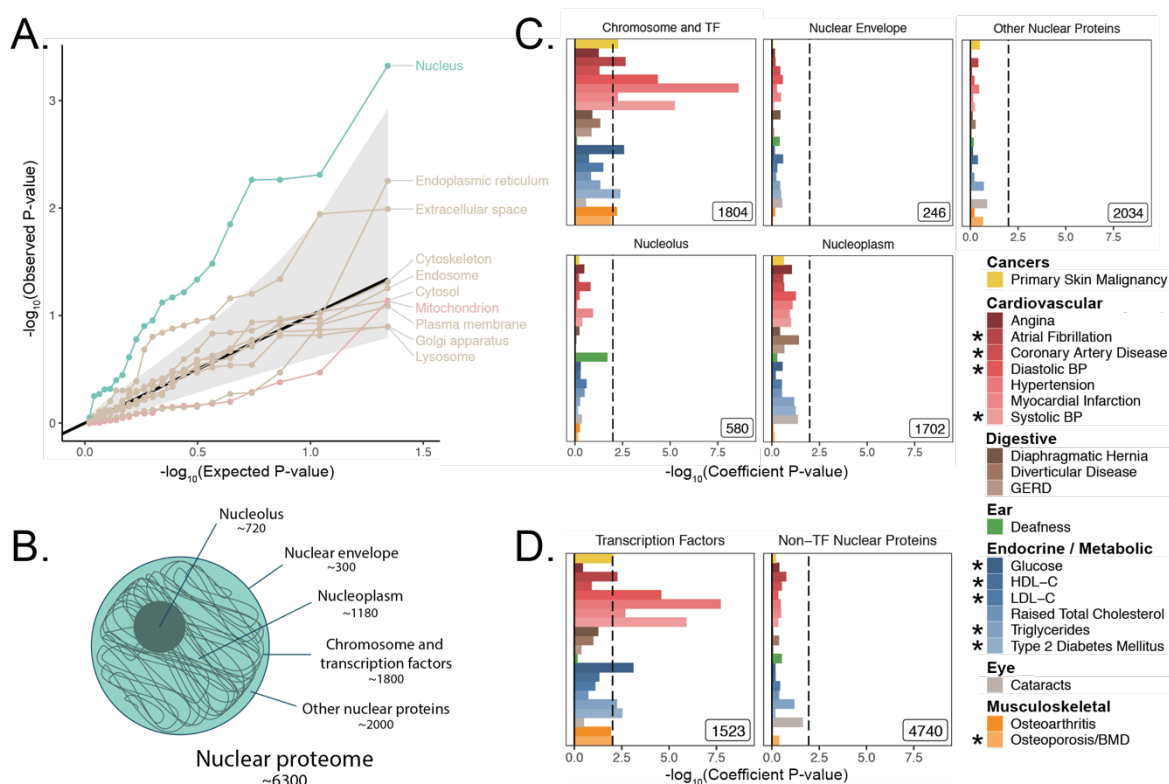

**Figure 3.** Heritability enrichment of organellar proteomes across age-related disease in UK Biobank. **A.** Quantile-quantile plot of heritability enrichment p-values atop the baseline model for gene-sets representing organellar proteomes, with black line representing expected null p-values following the uniform distribution and shaded ribbon representing 95% CI. **B.** Scheme of spatially distinct subsets of the nuclear proteome as a strategy to characterize observed enrichment of the nuclear proteome. Numbers represent gene-set size. **C.** S-LDSC enrichment p-values for spatial subsets of the nuclear proteome computed atop the baseline model. **D.** S-LDSC enrichment p-values for TFs and all other nucleus-localizing proteins. Inset numbers represent gene-set sizes, black lines represent cutoff at BH FDR < 10%. \* represent traits for which sufficiently well powered cohorts from both UKB and meta-analyses were available.

192 showed enrichment for a highly similar set of traits to those enriched for the whole set of TFs (**Figure**  
 193 **S15D, S16B, S17B, S18B**). Interestingly, the KRAB domain-containing zinc fingers (KRAB ZFs)<sup>57</sup>, which are  
 194 recently evolved (**Figure S15H**), were largely devoid of enrichment even compared to non-KRAB ZFs  
 195 (**Figure S15E, S16C, S17C, S18C**). Thus, we find that variation within or near non-KRAB domain-containing  
 196 transcription factor genes has an outside influence on age-associated disease heritability (**Table S8**).

197

198 **Mitochondrial genes tend to be more “haplosufficient” than genes encoding other organelles**

199 In light of observing heritability enrichment only among nuclear transcription factors, we wanted to  
 200 determine if the fitness cost of pLoF variation in genes across cellular organelles mirrored our results.  
 201 Mitochondria-localizing genes and TFs play a central role in numerous Mendelian diseases<sup>49,58–60</sup>, so we  
 202 initially hypothesized that genes belonging to either category would be under significant purifying  
 203 selection (i.e., constraint). We obtained constraint metrics from gnomAD

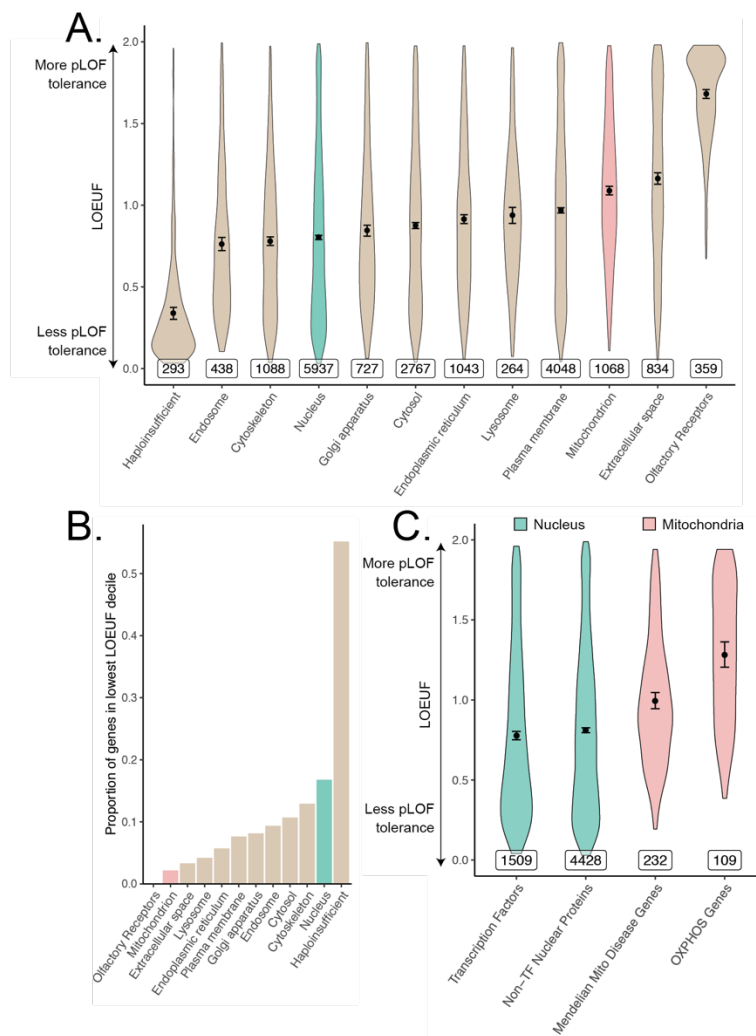

**Figure 4.** Differences in constraint distribution across organelles. **A.** Constraint as measured by LOEUF from gnomAD v2.1.1 for genes comprising organellar proteomes, book-ended by distributions for known haploinsufficient genes as well as olfactory receptors. Lower values indicate genes exacting a greater organismal fitness cost from a heterozygous LoF variant (greater constraint). **B.** Proportion of each gene-set found in the lowest LOEUF decile. Higher values indicate gene-sets containing more highly constrained genes. **C.** Constraint distributions for subsets of the nuclear-encoded mitochondrial proteome (red) and subsets of the nucleus (teal). Black points represent the mean with 95% CI. Inset numbers represent gene-set size.



204 (<https://gnomad.broadinstitute.org>)<sup>61</sup> as the LoF observed/expected fraction (LOEUF). In agreement with  
205 our GWAS enrichment results, we observed that the mitochondrion on average is one of the least  
206 constrained organelles we tested, in stark contrast to the nucleus (**Figure 4A**). In fact, the nucleus was  
207 second only to the set of “haploinsufficient” genes (defined based on curated human clinical genetic  
208 data<sup>61</sup>, **Methods**) in the proportion of its genes in the most constrained decile, while the mitochondrion  
209 lay on the opposite end of the spectrum (**Figure 4B**). Interestingly, even the Mendelian mitochondrial  
210 disease genes had a high tolerance to pLoF variation on average in comparison to TFs (**Figure 4C, S19A**).  
211 Even across different categories of TFs, we observed that highly constrained TF subsets tend to show  
212 GWAS enrichment (**Figure S19B, S15E**) relative to unconstrained subsets for our tested traits. Indeed,  
213 explicit inclusion of LOEUF as a covariate in the enrichment analysis model (**Methods**) reduced the  
214 significance of (but did not eliminate) the enrichment seen for the TFs (**Figure S20B, S21B, S20E, S20F**).  
215 Thus, while disruption in both mitochondrial genes and TFs can produce rare disease, the fitness cost of  
216 heterozygous variation in mitochondrial genes appears to be far lower than that among the TFs. This  
217 dichotomy reflects the contrasting enrichment results between the mitochondrial genes and the TFs and  
218 supports the importance of gene regulation as it relates to evolutionary conservation.

219

## 220 **Discussion**

221 Pathology in cellular organelles has been widely documented in age-related diseases<sup>3,7,62–65</sup>. Using a  
222 human genetics approach, here we report the unexpected discovery that except for the nucleus, cellular  
223 organelles tend not to be enriched in genetic associations for common, age-related diseases. We started  
224 with a focus on the mitochondria as a decline in mitochondrial abundance and activity has long been  
225 reported as one of the most consistent correlates of aging<sup>9,14,19,20</sup> and age-associated diseases<sup>10–13,15–18,21</sup>.  
226 We tested mitochondria-relevant common variants on the nucDNA and mtDNA and found no convincing  
227 evidence of heritability enrichment in any tested trait, cohort, or method. We systematically expanded  
228 our analysis to survey 10 organelles and found that only the nucleus showed enrichment, with much of  
229 this signal originating from nuclear transcription factors. Constraint analysis showed a substantial fitness  
230 cost to heterozygous loss-of-function mutation in genes encoding the nuclear proteome, whereas genes  
231 encoding the mitochondrial proteome were “haplosufficient.”

232 For highly polygenic and well-powered traits, any large fraction of the genome may explain a statistically  
233 significant amount of disease heritability<sup>66,67</sup>. Indeed, individual associations between mitochondria-  
234 relevant loci and certain common diseases have been identified previously<sup>68,69</sup>. As associations have also  
235 been identified among loci relevant for other organelles, enrichment analyses can place these complex  
236 genetic architectures in a broader biological context and prioritize pathways for follow-up. Importantly,  
237 both MAGMA and S-LDSC are capable of detecting an enrichment even in a highly polygenic background.  
238 Both methods have been used in the past to identify biologically plausible disease-relevant tissues<sup>36,50</sup> and  
239 pathway enrichments<sup>70,71</sup> in traits across the spectrum of polygenicity, and we identify enrichments  
240 among disease-relevant tissues using both methods in several highly polygenic traits.

241 While previous work has shown that common disease GWAS can be enriched for expression in specific  
242 disease-relevant organs<sup>50,72</sup>, our data suggest that this framework does not generally extend to organelles.  
243 This finding contrasts with our classical nosology of inborn errors of metabolism that tend to be mapped  
244 to “causal” organelles, e.g., lysosomal storage diseases, disorders of peroxisomal biogenesis, and  
245 mitochondrial OXPHOS disorders. The observed enrichment for transcription factors within the nucleus  
246 indicates that common variation influencing genome regulation impacts common disease risk more than  
247 variation influencing individual organelles.

248 Our analysis of common inherited mitochondrial variation represents, to our knowledge, the most  
249 comprehensive assessment of mitochondria-relevant nucDNA and mtDNA variation in age-related

250 diseases. We replicated mtDNA associations with creatinine and AST observed previously in BioBank  
251 Japan<sup>52</sup>, further supporting our approach. While individual mtDNA variants have been previously  
252 associated with certain traits<sup>73-75</sup>, these associations appear to be conflicting in the literature, perhaps  
253 because of limited power and/or uncontrolled confounding biases such as population stratification<sup>76,77</sup>.  
254 Our negative results are surprising, but they are not inconsistent with a small number of isolated reports  
255 interrogating either mitochondria-relevant nucDNA<sup>78</sup> or mtDNA<sup>52,79-81</sup> loci in select diseases.

256 To our knowledge, we are the first to systematically document heterogeneity in average pLoF across  
257 cellular organelles. That MitoCarta genes are “haplosufficient” and pLoF tolerant (**Figure 4A**) is consistent  
258 with the observation that most of the ~300 inborn mitochondrial disease genes produce disease with  
259 recessive inheritance<sup>49</sup> and healthy parents. The few mitochondrial disorders that show dominant  
260 inheritance are nearly always due to dominant negativity rather than haploinsufficiency. The intolerance  
261 of TFs to pLoF variation (**Figure 4A**) provide a stark contrast to the results from the mitochondria that is  
262 borne out in their associated Mendelian disease syndromes: TFs are known to be haploinsufficient<sup>82</sup> and  
263 even regulatory variants modulating their expression can produce severe Mendelian disease<sup>83</sup>. We  
264 observe heritability enrichment among TFs for 10 different diseases, consistent with observed elevated  
265 purifying selection against pLoF variants in these genes. Our enrichment results combined with pLoF  
266 intolerance suggest that variation among TFs may produce disease-associated variants with larger effect  
267 sizes than expectation, underscoring their importance as genetic “levers” for common disease heritability.

268 Why are mitochondria so robust to variation in gene dosage and hence “haplosufficient?” We propose  
269 three possibilities. First, one possibility is pathway redundancy. For example, in cell culture, defective  
270 OXPHOS can be supported thanks to the action of non-mitochondrial pathways such as cytosolic glycolysis  
271 and nucleotide salvage as long as key environmental nutrients are provided<sup>84</sup>. Second, mitochondrial  
272 pathways tend to be highly interconnected, and it was already proposed by Wright<sup>85</sup> and later by Kacser  
273 and Burns<sup>86</sup> that haplosufficiency arises as a consequence of physiology, i.e., network organization of  
274 metabolic reactions. Kacser and Burns in fact explicitly mention that noncatalytic gene products fall  
275 outside their framework, and we believe that our finding that nucleus-localizing and cytoskeletal genes  
276 are the two most pLoF-intolerant compartments is consistent with their assessment. Third, mitochondria  
277 were formerly autonomous microbes and hence may have retained vestigial layers of “intra-organelle  
278 buffering” against genetic variation. Numerous feedback control mechanisms, including respiratory  
279 control<sup>87</sup>, help to ensure organelle robustness across physiological extremes<sup>88,89</sup>. In fact, a recent CRISPR  
280 screen showed that of the genes for which knock-out modified survival under a mitochondrial poison,  
281 there is a striking over-representation of genes that themselves encode mitochondrial proteins<sup>90</sup>.

282 Throughout this study, we have tested inherited common variant associations via an additive genetic  
283 model. We acknowledge the limitations of focusing on a specific genetic model and variant frequency  
284 regime, though note that common variation is the largest documented source of narrow-sense  
285 heritability, which typically accounts for a majority of disease heritability<sup>91,92</sup>. First, we consider only  
286 common variants. While rare variants may prove to be instructive, it is notable that a previous rare variant  
287 analysis in T2D<sup>93</sup> failed to show enrichment among OXPHOS genes. Second, we consider only additive  
288 genetic models. A recessive model may be particularly fruitful for mitochondria-relevant loci given their  
289 tolerance to pLoF variation, however these models are frequently power-limited and may not explain  
290 much more phenotypic variance than additive models<sup>94,95</sup>. Third, we have not considered epistasis. The  
291 effects of mtDNA-nucDNA interactions<sup>96</sup> in common diseases have yet to be assessed. While there is  
292 debate about whether biologically-relevant epistasis can be simply captured by main effects<sup>92,94,97,98</sup> at  
293 individual loci, it is possible that modeling mtDNA-nucDNA interactions will reveal new contributions.  
294 Finally, it is crucial not to confuse our results with previously reported associations between somatic  
295 mtDNA mutations and age-associated disease<sup>18-20</sup> – the present work is focused on germline variation.

296 We emphasize that our study does not formally address the causality of mitochondrial dysfunction in  
297 common age-related disease. Rather, we have tested if common variants in mitochondrial pathways tend  
298 to explain a disproportionate amount of age-related disease heritability. The observed lack of heritability  
299 enrichment in mitochondrial pathways does not preclude the possibility of a therapeutic benefit in  
300 targeting the mitochondrion for age-related disease. For example, mitochondrial dysfunction is  
301 documented in brain or heart infarcts following blood vessel occlusion in laboratory-based models<sup>99,100</sup>.  
302 Though mitochondrial variants do not influence infarct risk in this laboratory model, pharmacological  
303 blockade of the mitochondrial permeability transition pore can mitigate reperfusion injury and infarct  
304 size<sup>101</sup>. Future studies will be required to determine if and how the mitochondrial dysfunction associated  
305 with common age-associated diseases can be targeted for therapeutic benefit.

306 Our finding that the nucleus is the only organelle that shows enrichment for common age-associated trait  
307 heritability builds on prior work implicating nuclear processes in aging. Most human progeroid syndromes  
308 result from monogenic defects in nuclear components<sup>102</sup> (e.g., *LMNA* in Hutchinson-Gilford progeria  
309 syndrome, *TERC* in dyskeratosis congenita), and telomere length has long been observed as a marker of  
310 aging<sup>103</sup>. Heritability enrichment of age-related traits among gene regulators is consistent with the  
311 epigenetic dysregulation<sup>104</sup> and elevated transcriptional noise<sup>3,105</sup> observed in aging (e.g., *SIRT6*  
312 modulation influences mouse longevity<sup>106</sup> and metabolic syndrome<sup>63</sup>). An important role for gene  
313 regulation in common age-related disease is in agreement with both the observation that a very large  
314 fraction of common disease-associated loci corresponds to the non-coding genome and the enrichment  
315 of disease heritability in histone marks and transcription factor binding sites<sup>36,107</sup>. Given that a  
316 deterioration in several other cellular organelles has been linked to age-related traits, a future challenge  
317 lies in elucidating the connection between variation influencing transcription factors and organelle  
318 dysfunction in age-related disease.

319

### 320 **Acknowledgements**

321 We thank D. Altshuler, S.E. Calvo, H. Finucane, E.S. Lander, M.E. MacDonald, D. Palmer, E.B. Robinson,  
322 A.V. Segrè, M.E. Talkowski, R.K. Walters, C.C. Winter, and members of the Mootha and Neale labs for  
323 critical feedback and discussions. This research has been conducted using the UK Biobank Resource under  
324 Application Number 31063. This project was supported in part by grants (NIH R35GM122455 to V.K.M.  
325 and NIH T32 AG000222 to R.G.) from the National Institutes of Health. VKM is an Investigator of the  
326 Howard Hughes Medical Institute.

327

### 328 **Data Availability**

329 Genetic correlation point estimates and standard errors plotted in Figure 1B is available in Table S2.  
330 Summary statistics from mtDNA-GWAS available in Table S6. All gene-based enrichment analysis p-values  
331 and point estimates are available in Table S8. Literature-reported loci associated with biomarkers of  
332 mitochondrial function after clumping and QC are available in Table S4. Period prevalence data for  
333 diseases in the UK can be obtained from Kuan et al. 2019. Gene-sets can be found using COMPARTMENTS  
334 (<https://compartments.jensenlab.org>), MitoCarta 2.0  
335 (<https://www.broadinstitute.org/files/shared/metabolism/mitocarta/human.mitocarta2.0.html>),  
336 Lambert et al. 2018 (DOI: 10.1016/j.cell.2018.01.029), Frazier et al. 2019 (DOI: 10.1074/jbc.R117.809194),  
337 Finucane et al. 2018 (<https://alkesgroup.broadinstitute.org/LDSCORE/>), Kapopoulou et al. 2015 (DOI:  
338 10.1111/evo.12819), and the Macarthur laboratory ([https://github.com/macarthur-lab/gene\\_lists](https://github.com/macarthur-lab/gene_lists)). Gene  
339 age estimates were obtained from Litman, Stein 2019 (DOI: 10.1053/j.seminoncol.2018.11.002). GWAS  
340 catalog annotations can be obtained from: <https://www.ebi.ac.uk/gwas>. UKB heritability estimates can  
341 be obtained at: [https://nealelab.github.io/UKBB\\_ldsc/](https://nealelab.github.io/UKBB_ldsc/). UKB summary statistics can be obtained from  
342 Neale lab GWAS round 2: [https://github.com/Nealelab/UK\\_Biobank\\_GWAS](https://github.com/Nealelab/UK_Biobank_GWAS). Annotations for the Baseline

343 v1.1 and BaselineLD v2.2 models as well as other relevant reference data, including the 1000G EUR  
344 reference panel, can be obtained from <https://alkesgroup.broadinstitute.org/LDSCORE/>. eQTL and  
345 expression data in human tissues can be obtained from GTEx (<https://www.gtexportal.org>). Constraint  
346 estimates can be found via gnomAD: <https://gnomad.broadinstitute.org>. See citations for publicly  
347 available GWAS meta-analysis summary statistics<sup>26–35</sup>.

348

#### 349 **Code Availability**

350 Our analysis leverages publicly available tools including LDSC for heritability enrichment and genetic  
351 correlation (<https://github.com/bulik/ldsc>), MAGMA v1.07b for gene-set enrichment analysis  
352 (<https://ctg.cncr.nl/software/magma>), PLINK v1.07 for linkage disequilibrium clumping  
353 (<https://zzz.bwh.harvard.edu/plink/>), and Hail v0.2.51 for distributed computing and mtDNA GWAS  
354 (<https://hail.is>).

355

#### 356 **Competing Interests**

357 VKM is an advisor to and receives compensation or equity from Janssen Pharmaceuticals, 5am Ventures,  
358 and Raze Therapeutics. BMN is a member of the scientific advisory board at Deep Genomics and RBNC  
359 Therapeutics. BMN is a consultant for Camp4 Therapeutics, Takeda Pharmaceutical and Biogen. KJK is a  
360 consultant for Vor Biopharma.

361

#### 362 **Author Contributions**

363 R.G., B.M.N., and V.K.M. conceived of the project; R.G., K.J.K., D.H. designed analyses; R.G. performed  
364 analyses; B.M.N., V.K.M. supervised project; R.G. and V.K.M. wrote the manuscript with input from  
365 other authors.

## 366 **Materials and Methods**

### 367 Trait selection:

368 Sex-standardized period prevalence of over 300 diseases was obtained from an extensive survey of the  
369 National Health Service in the UK as reported previously<sup>24</sup>. To select high prevalence late-onset diseases,  
370 we ranked diseases with a median onset over 50 years of age by the sum of the period prevalence of all  
371 age categories above 50. We selected the top 30 diseases using this metric and manually mapped these  
372 traits to similar or equivalent phenotypes with publicly available summary statistics from UKB and/or well-  
373 powered meta-analyses (e.g., Parkinson's Disease and Alzheimer's Disease for dementia) resulting in 24  
374 traits with data available in UKB, meta-analyses, or both (**Table S1**).

375

### 376 Criteria for inclusion of summary statistics:

377 We manually mapped selected age-related diseases and traits to corresponding phenotypes in UKB. In  
378 parallel, we searched the literature to identify well-powered EUR-predominant GWAS (referred to as  
379 meta-analyses) that (1) used primarily non-targeted arrays, (2) had publicly available full summary  
380 statistics, and (3) did not enroll individuals from UKB to serve as independent replication (**Supplementary**  
381 **note**). For UKB, we obtained heritability estimates ([https://github.com/Nealelab/UKBB\\_ldsc](https://github.com/Nealelab/UKBB_ldsc)) previously  
382 computed using stratified linkage-disequilibrium score regression (S-LDSC,  
383 <https://github.com/bulik/ldsc>)<sup>36</sup> atop the BaselineLD v1.1 model using reference LD scores computed  
384 from 1000G EUR. For meta-analyses, we computed heritability estimates with S-LDSC atop the updated  
385 BaselineLD v2.2 model using reference LD scores computed from 1000G EUR  
386 (<https://alkesgroup.broadinstitute.org/LDSCORE/>). We computed the heritability Z-score, a statistic that  
387 captures sample size, polygenicity, and heritability<sup>36</sup>, and included only traits with heritability Z-score > 4  
388 (**Supplementary note**) for further analysis.

389

### 390 Genetic correlations in UKB:

391 Pairwise genetic correlations,  $r_g$ , were computed using linkage-disequilibrium score correlation<sup>37</sup> on all  
392 selected age-related traits with heritability Z-score > 4. We used UKB summary statistics  
393 ([https://github.com/Nealelab/UK\\_Biobank\\_GWAS](https://github.com/Nealelab/UK_Biobank_GWAS)) for all sufficiently powered traits; summary statistics  
394 from meta-analyses were used for eGFR<sup>33</sup>, Alzheimer's Disease<sup>35</sup>, and Parkinson's Disease<sup>34</sup> as these traits  
395 showed heritability Z-score > 4 within meta-analyses but not in UKB (**Table S1**). P-values for genetic  
396 correlation represented deviation from the null hypothesis  $r_g = 0$ . Traits were ordered by their  
397 contribution to the first eigenvector of the absolute value of the correlation matrix, with point estimates  
398 and standard errors available in **Table S2**. Bonferroni correction was applied producing a p-value cutoff of  
399  $0.05/\binom{24}{2} = 1.81 * 10^{-4}$ .

400

### 401 Assessment of mitochondria-localizing genes in the GWAS Catalog:

402 We mapped variants in the GWAS Catalog (obtained on September 5<sup>th</sup>, 2019,  
403 <https://www.ebi.ac.uk/gwas/>) meeting genome-wide significance ( $p < 5e-8$ ) to genes using provided  
404 annotations, producing a set of trait-associated genes for each trait. We manually selected phenotypes  
405 represented in the GWAS Catalog matching our set of age-associated traits with over annotated 30 trait-  
406 associated genes. For each trait, we computed the proportion of trait associated genes that were  
407 mitochondria-localizing (defined via MitoCarta2.0<sup>22</sup>) and tested for enrichment or depletion relative to  
408 overall genome background using two-sided Fisher's exact tests correcting for multiple hypothesis tests  
409 with the Benjamini-Hochberg (BH) procedure at FDR q-value < 0.1.

410 We also computed the test statistic  $N_g^{enrich}$ , defined as the number of age-associated traits showing a  
411 nominal (not necessarily statistically significant) enrichment for a given gene-set  $g$ , for the MitoCarta  
412 genes. We then generated an empirical null distribution for  $N_g^{enrich}$ . We drew 1,000 random samples of

413 protein-coding genes, where each sample contained the same number of genes as the set of  
414 mitochondria-localizing genes and computed  $N_g^{enrich}$  for each of these gene-sets (**Figure S1B**). The one-  
415 sided p-value, defined as  $\Pr(N_g^{enrich} \leq x)$  under the null, was subsequently obtained.

416 We expanded our enrichment/depletion analysis to all 332 traits in the GWAS Catalog with over 30 trait-  
417 associated genes; for enrichment or depletion testing, we used two-sided Fisher's exact tests and  
418 corrected for multiple hypothesis testing with the BH procedure at FDR q-value < 0.1.

419

#### 420 Enrichment analysis of literature-curated mitochondria-associated phenotypes:

421 We reviewed the literature for quantitative trait loci (QTLs) for mtDNA copy number (mtCN)<sup>40,41</sup>, mtRNA  
422 abundance/modification<sup>42,43</sup>, and biomarkers of OXPHOS dysfunction (namely lactate, pyruvate,  
423 lactate/pyruvate ratio<sup>46-48</sup>, and GDF15 abundance<sup>44,45</sup>) (**Supplementary note**). We subsequently used  
424 PLINK v1.07 (<https://zzz.bwh.harvard.edu/plink/>)<sup>108</sup> to identify independent variants for each phenotype  
425 based on the 1000G EUR reference panel (**Supplementary note**). To test for overlap with UKB age-  
426 associated disease traits, we divided curated variants into three classes: mtCN-related (21 variants),  
427 mtRNA-related (78 variants), and OXPHOS biomarkers (62 variants). For each of the 21 UKB age-related  
428 disease traits, we computed the number of genome-wide significant ( $p < 5e-8$ ) variants that overlapped  
429 the curated variants for each class, termed  $N_c^{overlap}$  where c is the class. We only considered variants  
430 with INFO > 0.8 and MAF > 0.001 or expected case MAC > 25. For significance testing, we generated an  
431 empirical null distribution around  $N_c^{overlap}$  including only variants with INFO > 0.8. For each class, we  
432 drew variants at random 2500 times matching on LD score, in-sample MAF, and distance to transcription  
433 start site (where the distance metric was set to 0 if the variant was located within a gene boundary). LD  
434 scores per variant were generated per-chromosome with a 1 cm window using the 1000G EUR reference  
435 panel. The  $N_c^{overlap}$  was then computed for each category for each set of randomly selected variants,  
436 generating a category specific empirical null distribution for the statistic (**Figure S2**). The one-sided p-  
437 value, defined as  $\Pr(N_c^{overlap} \geq x)$  under the null, was subsequently obtained. To correct for multiple  
438 hypothesis testing, we applied the BH procedure with FDR < 0.1 and also applied a Bonferroni threshold  
439 of  $P = \frac{0.1}{21*3} \approx 0.0016$ .

440

#### 441 Harmonization and filtering of summary statistics for LDSC and MAGMA:

442 UKB summary statistics previously formatted for use with LDSC and filtered to HapMap3 (HM3) SNPs  
443 ([https://github.com/Nealelab/UKBB\\_Idsc](https://github.com/Nealelab/UKBB_Idsc)) were used for analysis with S-LDSC. For analysis with MAGMA  
444 v1.07b<sup>51</sup>, we included variants from the full Neale Lab UKB Round 2 GWAS summary statistics  
445 ([https://github.com/Nealelab/UK\\_Biobank\\_GWAS](https://github.com/Nealelab/UK_Biobank_GWAS)) with INFO > 0.8 and MAF > 0.01, and excluded any  
446 variants flagged as low confidence (a heuristic defined by MAF < 0.001 or expected case MAC < 25).

447 Summary statistics obtained from publicly available GWAS meta-analyses<sup>26-35</sup> were reported in varied  
448 formats. We manually verified the genome build upon which each meta-analysis reported results and  
449 ensured that all sets of summary statistics contained columns listing P-value, variant rsID, genome-build  
450 specific coordinates, and if available, variant-specific sample size (**Table S1**). If variant coordinates or rsID  
451 were not provided, the relevant columns were obtained from dbSNP database version 130 (for hg18) or  
452 146 (for hg19). We used the summary statistic munging script provided with S-LDSC  
453 (<https://github.com/bulik/ldsc>) to generate summary statistics compatible with S-LDSC, restricting to  
454 HM3 SNPs as these tend to be best behaved for analysis with LDSC. For use of meta-analyses with  
455 MAGMA<sup>51</sup>, we restricted analysis to variants with INFO > 0.8 and MAF > 0.01 if such information was  
456 provided.

457

#### 458 Multiple testing correction for gene-set enrichment analysis:

459 To account for the multiple hypothesis tests performed throughout this study, we obtained p-value  
460 thresholds via the BH procedure at FDR < 0.1 for all gene-sets assessed for a given method and cohort  
461 type (where the two cohort types were UKB and meta-analysis).

462

#### 463 Gene-set based enrichment analysis:

464 We extensively use S-LDSC and MAGMA to perform gene-set enrichment analyses among GWAS summary  
465 statistics. To test enrichment with S-LDSC, SNPs were mapped to each gene with a 100kb symmetric  
466 window as recommended<sup>50</sup> and LD scores were computed using the 1000G EUR reference panel  
467 (<https://alkesgroup.broadinstitute.org/LDSCORE/>) and subsequently restricted to the HM3 SNPs. We  
468 used S-LDSC to test for heritability enrichment controlling for 53 annotations including coding regions,  
469 enhancer regions, 5' and 3' UTRs, and others as previously described<sup>36</sup> (baseline v1.1, referred to as  
470 baseline model hereafter). We also used MAGMA with both 5kb up, 1.5kb down and 100kb symmetric  
471 windows to test for enrichment. MAGMA gene-level analysis was performed with the 1000G EUR LD  
472 reference panel to account for LD structure, and gene-set analysis was performed including covariates for  
473 gene length, variant density, inverse minor allele count (MAC), as well as log-transformed versions of  
474 these covariates. Statistical tests for both S-LDSC and MAGMA were one-sided, considering enrichment  
475 only. For both methods, we included the relevant superset of genes as a control to ensure that our analysis  
476 was competitive (**Supplementary note**). We refer to this approach as the 'usual approach'. All enrichment  
477 effect size estimates and p-values are available in **Table S8**.

478

#### 479 Enrichment analysis of genes comprising the mitochondrial proteome:

480 We obtained the set of nuclear-encoded mitochondria-localizing genes using MitoCarta2.0<sup>22</sup> and used the  
481 literature to obtain the subset of MitoCarta genes involved in inherited mitochondrial disease<sup>49</sup> as well as  
482 those producing components of oxidative phosphorylation (OXPHOS) complexes. We used both S-LDSC  
483 and MAGMA to test for enrichment in the usual way (**Methods**) controlling for the set of protein-coding  
484 genes to ensure a competitive analysis (**Supplementary note**). We also tested mitochondria-localizing  
485 genes for enrichment in meta-analyses using S-LDSC and MAGMA with the same parameters as for UKB  
486 traits (**Supplementary note**).

487

#### 488 Tissue-expressed gene-set enrichment analysis:

489 To obtain the set of genes most expressed in a given tissue versus others, we obtained t-statistics  
490 computed from GTEx v6 gene-level transcript-per-million (TPM) data corrected for age and sex as  
491 published previously<sup>50</sup>. For each tissue, we selected the top 2485 genes (10%) with the highest t-statistics  
492 for tissue-specific expression, producing tissue-expressed gene-sets. We selected nine tissues based on  
493 expectation of enrichment for our tested traits in UKB (e.g., liver for LDL levels, esophageal mucosa for  
494 GERD). We used both S-LDSC and MAGMA to test for enrichment in the usual way (**Methods**) controlling  
495 for the set of tissue-expressed genes to ensure a competitive analysis (**Supplementary note**). Tissue-  
496 expressed gene-set analyses were performed on meta-analyses with S-LDSC and MAGMA on the same  
497 tissues using the same parameters as used in UKB.

498

#### 499 Power analysis:

500 To test for the effects of gene-set size on power, we selected ten positive control tissue-trait pairs based  
501 on (1) the presence of tissue enrichment in UKB with S-LDSC and MAGMA and (2) if the observed  
502 enrichment was biologically plausible. The pairs tested were liver-HDL, liver-LDL, liver-TG, liver-  
503 cholesterol, pancreas-glucose, pancreas-type 2 diabetes, atrial appendage-atrial fibrillation, sigmoid  
504 colon-diverticular disease, coronary artery-myocardial infarction, and visceral adipose-HDL. We then, in  
505 brief, used an empirical sampling-based approach, generating random subsamples of a selected set of  
506 tissue-expressed gene-sets at four different gene-set sizes (1523, 1105, 800, and 350 genes), defining

507 power as the proportion of trials showing a significant enrichment (**Supplementary note**). We used the  
508 same sub-sampled gene-sets for enrichment analysis using both S-LDSC and MAGMA in the usual way  
509 (**Methods**) controlling for the set of tissue-expressed genes to ensure a competitive analysis  
510 (**Supplementary note**). We used the same gene-sets among the subset of the positive control traits that  
511 showed enrichment in the corresponding meta-analysis to verify power for the meta-analyses  
512 (**Supplementary note**).

513

#### 514 Cross-tissue eQTL analysis

515 We obtained the set of eGenes from GTEx v8 across 49 tissues (<https://www.gtexportal.org>), filtering to  
516 only include cis-eQTLs with q-value < 0.05. To determine how the landscape of cis-eQTLs for MitoCarta  
517 genes compared to other protein-coding genes, we regressed the number of tissues with a detected cis-  
518 eQTL for a given gene  $x$ ,  $N_x^{eQTL}$ , onto an indicator for membership in a given organellar proteome  
519 ( $I_x^{organelle}$ ), controlling for gene length, log gene length, breadth of expression ( $\tau_x$ ), and the number of  
520 tissues with detected expression > 5 TPM ( $N_x^{express}$ , **Supplementary note**). To quantify breadth of  
521 expression, we obtained median-per-tissue GTEx v8 TPM expression values and computed  $\tau^{109}$  after  
522 removing lowly-expressed genes with maximal cross-tissue TPM < 1, defined as:

523

$$524 \quad \tau_x = \frac{\sum_{i=1}^n (1 - \hat{x}_i)}{n - 1} \text{ where } \hat{x}_i = \frac{x_i}{\max_{1 \leq i \leq n} x_i}$$

525

526 where  $x_i$  is the expression of gene  $x$  in tissue  $i$  with  $n$  tissues.  $\tau$  ranges from 0 to 1, with lower  $\tau$  indicating  
527 broadly expressed gene and higher  $\tau$  indicating more tissue specific expression patterns. Because GTEx  
528 sampled multiple tissue subtypes (e.g., brain sub-regions) that show correlated expression profiles<sup>110</sup>  
529 which bias  $\tau_x$ ,  $N_x^{eQTL}$ , and  $N_x^{express}$  upward, for each broader tissue class (brain, heart, artery, esophagus,  
530 skin, cervix, colon, adipose) we selected a single representative tissue when computing these quantities  
531 (**Figure S14B, Supplementary note**). We used LD scores computed from the 1000G EUR reference panel.  
532 The model, fit via OLS for each tested organelle, was:

533

$$534 \quad N_x^{eQTL} \sim I_x^{organelle} + N_x^{express} + \tau_x + \log(\text{gene length}) + \text{gene length}$$

535

#### 536 mtDNA-wide association study:

537 We obtained mtDNA genotype data on 265 variants as obtained on the UK Biobank Axiom array and the  
538 UK BiLEVE array from the full UKB release<sup>25</sup>. To perform variant QC, we used evoker-lite<sup>111</sup> to generate  
539 fluorescence cluster plots per-variant and per-batch and manually inspected the results, removing 19  
540 variants due to cluster plot abnormalities (**Table S5, Supplementary note**). We additionally removed any  
541 variants with heterozygous calls, within-array-type call rate < 0.95, and with less than 20 individuals with  
542 an alternate genotype. For case-control traits, we removed any phenotype-variant pair with an expected  
543 case count of alternate genotype individuals of less than 20, resulting in a maximum of 213 variants tested  
544 per trait (**Supplementary note**). To perform sample QC, we restricted samples to the same samples from  
545 which UKB summary statistics were generated ([https://github.com/Nealelab/UK\\_Biobank\\_GWAS](https://github.com/Nealelab/UK_Biobank_GWAS)),  
546 namely unrelated individuals 7 standard deviations away from the first 6 European sample selection PCs  
547 with self-reported white-British, Irish, or White ethnicity and no evidence of sex chromosome aneuploidy.  
548 We additionally removed any samples with within-array-type mitochondrial variant call rate < 0.95,  
549 resulting in 360,662 unrelated samples of EUR ancestry. We generated the LD matrix for mitochondrial  
550 DNA variants using Hail v0.2.51 (<https://hail.is>) pairwise for all 213 variants tested across all post-QC  
551 samples.



552 We ran mtDNA-GWAS for all 21 UKB age-related phenotypes as well as creatinine and AST using Hail  
553 v0.2.51 via linear regression controlling for the first 20 PCs of the nuclear genotype matrix, sex, age, age<sup>2</sup>,  
554 sex\*age, and sex\*age<sup>2</sup> as performed for the UKB GWAS  
555 ([https://github.com/Nealelab/UK\\_Biobank\\_GWAS](https://github.com/Nealelab/UK_Biobank_GWAS)). We also used Hail to run Firth logistic regression with  
556 the same covariates for case/control traits (**Table S1**). As we observed that some mitochondrial DNA  
557 variants were specific to array type, we also ran linear regression including array type as a covariate; we  
558 did not perform logistic regression with array type as a covariate due to convergence issues secondary to  
559 complete separation of variants assessed only on only array type. We defined mtDNA-wide significance  
560 using a Bonferroni correction by  $p = \frac{0.05}{4337} \approx 1.15e - 5$ .

561

562 *Enrichment analysis of components of organellar proteomes:*

563 COMPARTMENTS (<https://compartments.jensenlab.org>)<sup>53</sup> is a resource integrating several lines of  
564 evidence for protein localization predictions including annotations, text-mining, sequence predictions,  
565 and experimental data from the Human Protein Atlas. We used this resource to obtain the degree of  
566 evidence (a number ranging from 0 to 5) linking each gene to localization to one of 12 organelles: nucleus,  
567 cytosol, cytoskeleton, peroxisome, lysosome, endoplasmic reticulum, Golgi apparatus, plasma  
568 membrane, endosome, extracellular space, mitochondrion, and proteasome. To avoid noisy localization  
569 assignments due to weak text mining and prediction evidence, we only considered localization  
570 assignments with a score > 2 as described previously<sup>53</sup>. We subsequently assigned compartment(s) to each  
571 gene by selecting the compartment(s) with the maximal score within each gene. We only included  
572 compartments containing over 240 genes due to limited power at these smaller gene-set sizes and used  
573 MitoCarta2.0<sup>22</sup> to obtain a higher confidence set of genes localizing to the mitochondrion, resulting in  
574 gene-sets representing the proteomes of 10 organelles. S-LDSC and MAGMA were used to test for  
575 enrichment across the UKB age-related traits for these gene-sets in the usual way, controlling for the set  
576 of protein-coding genes. S-LDSC was also used to obtain estimates of the percentage of heritability  
577 explained by each organelle gene-set.

578

579 *Enrichment analysis of spatial components of the nucleus:*

580 To produce interpretable sub-divisions of the nucleus, we used Gene Ontology (GO)<sup>54,55</sup> to identify terms  
581 listed as children of the nucleus cellular component (GO:0005634). We used Ensembl version 99<sup>112</sup> to  
582 obtain a first pass set of genes annotated to each sub-compartment of the nucleus (or its children). After  
583 manual review of sub-compartments with > 90 genes, we selected nucleoplasm (GO:0005654), nuclear  
584 chromosome (GO:0000228), nucleolus (GO:0005730), nuclear envelope (GO:0005635), splicosomal  
585 complex (GO:0005681), nuclear DNA-directed RNA polymerase complex (GO:0055029), and nuclear pore  
586 (GO:0005643). We excluded terms listed as 'part' due to poor interpretability and manually excluded  
587 similar terms (e.g., nuclear lumen vs nucleoplasm). To generate a high confidence set of genes localizing  
588 to each of these selected sub-compartments, we then turned to the COMPARTMENTS resource which  
589 assigns localization confidence scores for each protein to GO cellular component terms. We assigned  
590 members of the nuclear proteome to these selected nuclear sub-compartments using same the approach  
591 outlined for the organelle analysis (**Methods**). After filtering our selected sub-compartments to those  
592 containing > 240 genes, we obtained four categories: nucleoplasm, nuclear chromosome, nucleolus, and  
593 nuclear envelope. The nuclear chromosome annotation was largely overlapping with a manually curated  
594 high-quality list of transcription factors<sup>56</sup> however was not exhaustive; as such, we merged these lists to  
595 generate the chromosome and TF category. To improve interpretability, we removed genes from  
596 nucleoplasm that were also assigned to another nuclear sub-compartment, constructed a list of other  
597 nucleus-localizing proteins not captured in these four sub-compartments, and included only genes  
598 annotated as localizing to the nucleus (**Methods**). S-LDSC and MAGMA were used to test for enrichment

599 across the UKB age-related traits for these gene-sets in the usual way while controlling for the set of  
600 protein-coding genes (**Methods**).

601

602 *Enrichment analysis of functionally distinct TF subsets:*

603 We used a published curated high-quality list of TFs<sup>56</sup> to partition the Chromosome and TF category into  
604 transcription factors and other chromosomal proteins. To determine which TFs are broadly expressed  
605 versus tissue specific, we computed  $\tau$  per TF across all selected tissues after removing lowly-expressed  
606 genes with maximal cross-tissue TPM < 1 (**Methods, Supplementary note**). The threshold for tissue-  
607 specific genes was set at  $\tau \geq 0.76$  based on the location of the central nadir of the resultant bimodal  
608 distribution (**Figure S14A**). To identify terciles of TFs by age, we obtained relative gene age assignments  
609 for each gene previously generated by obtaining the modal earliest ortholog level across several databases  
610 mapped to 19 ordered phylostrata<sup>113</sup>. DNA binding domain (DBD) annotations for the TFs were obtained  
611 from previous manual curation efforts<sup>56</sup>. S-LDSC and MAGMA were used to test for enrichment across the  
612 UKB age-related traits for these gene-sets in the usual way while controlling for the set of protein-coding  
613 genes (**Methods**). We also tested TFs for enrichment in meta-analyses using S-LDSC and MAGMA with the  
614 same parameters as for UKB traits (**Supplementary note**).

615

616 *Analysis of constraint across organelles and sub-organelle gene-sets:*

617 We obtained gene-level gnomAD v2.1.1 constraint tables (<https://gnomad.broadinstitute.org>),  
618 haploinsufficient genes, and olfactory receptors<sup>61</sup> ([https://github.com/macarthur-lab/gene\\_lists](https://github.com/macarthur-lab/gene_lists)).  
619 Constraint values as loss-of-function observed/expected fraction (LOEUF) were mapped to genes within  
620 organelle, sub-mitochondrial, sub-nuclear, and TF binding domain gene-sets.

621

622 *Enrichment analysis across age-related disease holding constraint as a covariate:*

623 To test for enrichment with constraint as a covariate, we used MAGMA with UKB age-related traits. We  
624 mapped variants to genes and performed the gene-level analysis as done previously for the mitochondria-  
625 localizing gene and organelle analysis. We included LOEUF and log LOEUF as covariates for the gene-set  
626 analysis in addition to the default covariates (gene length, SNP density, inverse MAC, as well as the  
627 respective log-transformed versions) via the `-condition-residualize` flag.

- 628 1. Wang K, Gaitsch H, Poon H, Cox NJ, Rzhetsky A. Classification of common human diseases derived  
629 from shared genetic and environmental determinants. *Nat Genet.* 2017;49(9):1319-1325.  
630 doi:10.1038/ng.3931
- 631 2. Claussnitzer M, Cho JH, Collins R, et al. A brief history of human disease genetics. *Nature.*  
632 2020;577(7789):179-189. doi:10.1038/s41586-019-1879-7
- 633 3. López-Otín C, Blasco MA, Partridge L, Serrano M, Kroemer G. The hallmarks of aging. *Cell.*  
634 2013;153(6):1194. doi:10.1016/j.cell.2013.05.039
- 635 4. Mizushima N, Levine B, Cuervo AM, Klionsky DJ. Autophagy fights disease through cellular self-  
636 digestion. *Nature.* 2008;451(7182):1069-1075. doi:10.1038/nature06639
- 637 5. Hara T, Nakamura K, Matsui M, et al. Suppression of basal autophagy in neural cells causes  
638 neurodegenerative disease in mice. *Nature.* 2006;441(7095):885-889. doi:10.1038/nature04724
- 639 6. Komatsu M, Waguri S, Chiba T, et al. Loss of autophagy in the central nervous system causes  
640 neurodegeneration in mice. *Nature.* 2006;441(7095):880-884. doi:10.1038/nature04723
- 641 7. Özcan U, Cao Q, Yilmaz E, et al. Endoplasmic Reticulum Stress Links Obesity, Insulin Action, and  
642 Type 2 Diabetes. *Science (80- ).* 2004;306(5695):457 LP - 461.  
643 <http://science.sciencemag.org/content/306/5695/457.abstract>.
- 644 8. D'Angelo MA, Raices M, Panowski SH, Hetzer MW. Age-Dependent Deterioration of Nuclear Pore  
645 Complexes Causes a Loss of Nuclear Integrity in Postmitotic Cells. *Cell.* 2009;136(2):284-295.  
646 doi:10.1016/j.cell.2008.11.037
- 647 9. Fleischman A, Makimura H, Stanley TL, et al. Skeletal muscle phosphocreatine recovery after  
648 submaximal exercise in children and young and middle-aged adults. *J Clin Endocrinol Metab.*  
649 2010;95(9):69-74. doi:10.1210/jc.2010-0527
- 650 10. Petersen KF, Dufour S, Befroy D, Garcia R, Shulman GI. Impaired Mitochondrial Activity in the  
651 Insulin-Resistant Offspring of Patients with Type 2 Diabetes. *N Engl J Med.* 2004;350(7):664-671.  
652 doi:10.1056/nejmoa031314
- 653 11. Mootha VK, Lindgren CM, Eriksson KF, et al. PGC-1 $\alpha$ -responsive genes involved in oxidative  
654 phosphorylation are coordinately downregulated in human diabetes. *Nat Genet.* 2003;34(3):267-  
655 273. doi:10.1038/ng1180
- 656 12. Fannin SW, Lesnefsky EJ, Slabe TJ, Hassan MO, Hoppel CL. Aging selectively decreases oxidative  
657 capacity in rat heart interfibrillar mitochondria. *Arch Biochem Biophys.* 1999;372(2):399-407.  
658 doi:10.1006/abbi.1999.1508
- 659 13. Schapira AH V, Cooper JM, Dexter D, Clark JB, Jenner P, Marsden CD. Mitochondrial Complex I  
660 Deficiency in Parkinson's Disease. *J Neurochem.* 1990;54(3):823-827. doi:10.1111/j.1471-  
661 4159.1990.tb02325.x
- 662 14. Trounce I, Byrne E, Marzuki S. Decline in Skeletal Muscle Mitochondrial Respiratory Chain  
663 Function: Possible Factor in Ageing. *Lancet.* 1989;333(8639):637-639. doi:10.1016/S0140-  
664 6736(89)92143-0
- 665 15. Kelley DE, He J, Menshikova E V., Ritov VB. Dysfunction of mitochondria in human skeletal muscle  
666 in type 2 diabetes. *Diabetes.* 2002;51(10):2944-2950. doi:10.2337/diabetes.51.10.2944
- 667 16. Patti ME, Butte AJ, Crunkhorn S, et al. Coordinated reduction of genes of oxidative metabolism in  
668 humans with insulin resistance and diabetes: Potential role of PGC1 and NRF1. *Proc Natl Acad Sci*  
669 *U S A.* 2003;100(14):8466-8471. doi:10.1073/pnas.1032913100
- 670 17. Stump CS, Short KR, Bigelow ML, Schimke JM, Nair KS. Effect of insulin on human skeletal muscle  
671 mitochondrial ATP production, protein synthesis, and mRNA transcripts. *Proc Natl Acad Sci U S A.*  
672 2003;100(13):7996-8001. doi:10.1073/pnas.1332551100
- 673 18. Bender A, Krishnan KJ, Morris CM, et al. High levels of mitochondrial DNA deletions in substantia  
674 nigra neurons in aging and Parkinson disease. *Nat Genet.* 2006;38(5):515-517.  
675 doi:10.1038/ng1769

- 676 19. Taylor RW, Barron MJ, Borthwick GM, et al. Mitochondrial DNA mutations in human colonic crypt  
677 stem cells Find the latest version : Mitochondrial DNA mutations in human colonic crypt stem  
678 cells. *J Clin Invest*. 2003;112(9):1351-1360. doi:10.1172/JCI200319435. Introduction  
679 20. Wanagat J, Cao Z, Pathare P, Aiken JM. Mitochondrial DNA deletion mutations colocalize with  
680 segmental electron transport system abnormalities, muscle fiber atrophy, fiber splitting, and  
681 oxidative damage in sarcopenia. *FASEB J*. 2001;15(2):322-332. doi:10.1096/fj.00-0320com  
682 21. Ashar FN, Zhang Y, Longchamps RJ, et al. Association of mitochondrial DNA copy number with  
683 cardiovascular disease. *JAMA Cardiol*. 2017;2(11):1247-1255. doi:10.1001/jamacardio.2017.3683  
684 22. Calvo SE, Clauser KR, Mootha VK. MitoCarta2.0: An updated inventory of mammalian  
685 mitochondrial proteins. *Nucleic Acids Res*. 2016;44(D1):D1251-D1257. doi:10.1093/nar/gkv1003  
686 23. Schon EA, Dimauro S, Hirano M. Human mitochondrial DNA: Roles of inherited and somatic  
687 mutations. *Nat Rev Genet*. 2012;13(12):878-890. doi:10.1038/nrg3275  
688 24. Kuan V, Denaxas S, Gonzalez-Izquierdo A, et al. A chronological map of 308 physical and mental  
689 health conditions from 4 million individuals in the English National Health Service. *Lancet Digit  
690 Heal*. 2019;1(2):e63-e77. doi:10.1016/s2589-7500(19)30012-3  
691 25. Sudlow C, Gallacher J, Allen N, et al. UK Biobank: An Open Access Resource for Identifying the  
692 Causes of a Wide Range of Complex Diseases of Middle and Old Age. *PLoS Med*. 2015;12(3):1-10.  
693 doi:10.1371/journal.pmed.1001779  
694 26. Teslovich TM, Musunuru K, Smith A V, et al. Biological, clinical and population relevance of 95 loci  
695 for blood lipids. *Nature*. 2010;466(7307):707-713. <http://dx.doi.org/10.1038/nature09270>.  
696 27. Ehret GB, Munroe PB, Rice KM, et al. Genetic variants in novel pathways influence blood pressure  
697 and cardiovascular disease risk. *Nature*. 2011;478(7367):103-109. doi:10.1038/nature10405  
698 28. Manning AK, Hivert M-F, Scott RA, et al. A genome-wide approach accounting for body mass  
699 index identifies genetic variants influencing fasting glycemic traits and insulin resistance. *Nat  
700 Genet*. 2012;44(6):659-669. <http://dx.doi.org/10.1038/ng.2274>.  
701 29. Morris AP, Voight BF, Teslovich TM, et al. Large-scale association analysis provides insights into  
702 the genetic architecture and pathophysiology of type 2 diabetes. *Nat Genet*. 2012;44(9):981-990.  
703 doi:10.1038/ng.2383  
704 30. Schunkert H, König IR, Kathiresan S, et al. Large-scale association analysis identifies 13 new  
705 susceptibility loci for coronary artery disease. *Nat Genet*. 2011;43(4):333-340.  
706 doi:10.1038/ng.784  
707 31. Estrada K, Styrkarsdottir U, Evangelou E, et al. Genome-wide meta-analysis identifies 56 bone  
708 mineral density loci and reveals 14 loci associated with risk of fracture. *Nat Genet*.  
709 2012;44(5):491-501. doi:10.1038/ng.2249  
710 32. Christophersen IE, Rienstra M, Roselli C, et al. Large-scale analyses of common and rare variants  
711 identify 12 new loci associated with atrial fibrillation. *Nat Genet*. 2017;49(6):946-952.  
712 doi:10.1038/ng.3843  
713 33. Pattaro C, Teumer A, Gorski M, et al. Genetic associations at 53 loci highlight cell types and  
714 biological pathways relevant for kidney function. *Nat Commun*. 2016;7:1-19.  
715 doi:10.1038/ncomms10023  
716 34. Nalls MA, Blauwendraat C, Vallerga CL, et al. Identification of novel risk loci, causal insights, and  
717 heritable risk for Parkinson's disease: a meta-analysis of genome-wide association studies. *Lancet  
718 Neurol*. 2019;18(12):1091-1102. doi:10.1016/S1474-4422(19)30320-5  
719 35. Lambert JC, Ibrahim-Verbaas CA, Harold D, et al. Meta-analysis of 74,046 individuals identifies 11  
720 new susceptibility loci for Alzheimer's disease. *Nat Genet*. 2013;45(12):1452-1458.  
721 doi:10.1038/ng.2802  
722 36. Finucane HK, Bulik-Sullivan B, Gusev A, et al. Partitioning heritability by functional annotation  
723 using genome-wide association summary statistics. *Nat Genet*. 2015;47(11):1228-1235.

- 724 doi:10.1038/ng.3404
- 725 37. Bulik-Sullivan B, Finucane HK, Anttila V, et al. An atlas of genetic correlations across human  
726 diseases and traits. *Nat Genet.* 2015;47(11):1236-1241. doi:10.1038/ng.3406
- 727 38. Wasmer K, Eckardt L, Breithardt G. Predisposing factors for atrial fibrillation in the elderly. *J*  
728 *Geriatr Cardiol.* 2017;14(3):179-184. doi:10.11909/j.issn.1671-5411.2017.03.010
- 729 39. MacArthur J, Bowler E, Cerezo M, et al. The new NHGRI-EBI Catalog of published genome-wide  
730 association studies (GWAS Catalog). *Nucleic Acids Res.* 2016;45(November 2016):gkw1133.  
731 doi:10.1093/nar/gkw1133
- 732 40. Cai N, Li Y, Chang S, et al. Genetic Control over mtDNA and Its Relationship to Major Depressive  
733 Disorder. *Curr Biol.* 2015;25(24):3170-3177. doi:10.1016/j.cub.2015.10.065
- 734 41. Guyatt AL, Brennan RR, Burrows K, et al. A genome-wide association study of mitochondrial DNA  
735 copy number in two population-based cohorts. *Hum Genomics.* 2019;13(1):6.  
736 doi:10.1186/s40246-018-0190-2
- 737 42. Ali AT, Boehme L, Carbajosa G, Seitan VC, Small KS, Hodgkinson A. Nuclear genetic regulation of  
738 the human mitochondrial transcriptome. *Elife.* 2019;8:1-23. doi:10.7554/eLife.41927
- 739 43. Ali AT, Idaghdour Y, Hodgkinson A. Analysis of mitochondrial m1A/G RNA modification reveals  
740 links to nuclear genetic variants and associated disease processes. *Commun Biol.* 2020;3(1):1-11.  
741 doi:10.1038/s42003-020-0879-3
- 742 44. Folkersen L, Fauman E, Sabater-Lleal M, et al. Mapping of 79 loci for 83 plasma protein  
743 biomarkers in cardiovascular disease. *PLoS Genet.* 2017;13(4):1-21.  
744 doi:10.1371/journal.pgen.1006706
- 745 45. Jiang J, Thalamuthu A, Ho JE, et al. A meta-analysis of genome-wide association studies of growth  
746 differentiation factor-15 concentration in blood. *Front Genet.* 2018;9(MAR):1-13.  
747 doi:10.3389/fgene.2018.00097
- 748 46. Shin SY, Fauman EB, Petersen AK, et al. An atlas of genetic influences on human blood  
749 metabolites. *Nat Genet.* 2014;46(6):543-550. doi:10.1038/ng.2982
- 750 47. Suhre K, Shin SY, Petersen AK, et al. Human metabolic individuality in biomedical and  
751 pharmaceutical research. *Nature.* 2011;477(7362):54-62. doi:10.1038/nature10354
- 752 48. Raffler J, Friedrich N, Arnold M, et al. Genome-Wide Association Study with Targeted and Non-  
753 targeted NMR Metabolomics Identifies 15 Novel Loci of Urinary Human Metabolic Individuality.  
754 *PLoS Genet.* 2015;11(9):1-28. doi:10.1371/journal.pgen.1005487
- 755 49. Frazier AE, Thorburn DR, Compton AG. Mitochondrial energy generation disorders: Genes,  
756 mechanisms, and clues to pathology. *J Biol Chem.* 2019;294(14):5386-5395.  
757 doi:10.1074/jbc.R117.809194
- 758 50. Finucane HK, Reshef YA, Anttila V, et al. Heritability enrichment of specifically expressed genes  
759 identifies disease-relevant tissues and cell types. *Nat Genet.* 2018;50(4):621-629.  
760 doi:10.1038/s41588-018-0081-4
- 761 51. de Leeuw CA, Mooij JM, Heskes T, Posthuma D. MAGMA: Generalized Gene-Set Analysis of GWAS  
762 Data. *PLoS Comput Biol.* 2015;11(4):1-19. doi:10.1371/journal.pcbi.1004219
- 763 52. Yamamoto K, Sakaue S, Matsuda K, et al. Genetic and phenotypic landscape of the mitochondrial  
764 genome in the Japanese population. *Commun Biol.* 2020;3(1):104. doi:10.1038/s42003-020-0812-  
765 9
- 766 53. Binder JX, Pletscher-Frankild S, Tsaou K, et al. COMPARTMENTS: Unification and visualization of  
767 protein subcellular localization evidence. *Database.* 2014;2014:1-9.  
768 doi:10.1093/database/bau012
- 769 54. Carbon S, Douglass E, Dunn N, et al. The Gene Ontology Resource: 20 years and still GOing  
770 strong. *Nucleic Acids Res.* 2019;47(D1):D330-D338. doi:10.1093/nar/gky1055
- 771 55. Ashburner M, Ball CA, Blake JA, et al. Gene Ontology: Tool for The Unification of Biology. *Nat*

- 772 *Genet.* 2000;25(1):25-29. doi:10.1038/75556
- 773 56. Lambert SA, Jolma A, Campitelli LF, et al. The Human Transcription Factors. *Cell.* 2018;172(4):650-  
774 665. doi:10.1016/j.cell.2018.01.029
- 775 57. Kapopoulou A, Mathew L, Wong A, Trono D, Jensen JD. The evolution of gene expression and  
776 binding specificity of the largest transcription factor family in primates. *Evolution (N Y).*  
777 2016;70(1):167-180. doi:10.1111/evo.12819
- 778 58. Jimenez-Sanchez G, Childs B, Valle D. Human Disease Genes. *Nature.* 2001;409:853-855.
- 779 59. Worman HJ, Courvalin JC. The nuclear lamina and inherited disease. *Trends Cell Biol.*  
780 2002;12(12):591-598. doi:10.1016/S0962-8924(02)02401-7
- 781 60. Cleaver JE. It was a very good year for DNA repair. *Cell.* 1994;76(1):1-4. doi:10.1016/0092-  
782 8674(94)90165-1
- 783 61. Karczewski KJ, Francioli LC, Tiao G, et al. The mutational constraint spectrum quantified from  
784 variation in 141,456 humans. *Nature.* 2020;581(7809):434-443. doi:10.1038/s41586-020-2308-7
- 785 62. Colacurcio DJ, Nixon RA. Disorders of lysosomal acidification—The emerging role of v-ATPase in  
786 aging and neurodegenerative disease. *Ageing Res Rev.* 2016;32:75-88.  
787 doi:10.1016/j.arr.2016.05.004
- 788 63. Kanfi Y, Peshti V, Gil R, et al. SIRT6 protects against pathological damage caused by diet-induced  
789 obesity. *Aging Cell.* 2010;9(2):162-173. doi:10.1111/j.1474-9726.2009.00544.x
- 790 64. Blasco MA. Telomere length, stem cells and aging. *Nat Chem Biol.* 2007;3(10):640-649.  
791 doi:10.1038/nchembio.2007.38
- 792 65. Bhattarai KR, Chaudhary M, Kim H-R, Chae H-J. Endoplasmic Reticulum (ER) Stress Response  
793 Failure in Diseases. *Trends Cell Biol.* 2020;xx(xx):5-7. doi:10.1016/j.tcb.2020.05.004
- 794 66. De Leeuw CA, Neale BM, Heskes T, Posthuma D. The statistical properties of gene-set analysis.  
795 *Nat Rev Genet.* 2016;17(6):353-364. doi:10.1038/nrg.2016.29
- 796 67. Loh PR, Bhatia G, Gusev A, et al. Contrasting genetic architectures of schizophrenia and other  
797 complex diseases using fast variance-components analysis. *Nat Genet.* 2015;47(12):1385-1392.  
798 doi:10.1038/ng.3431
- 799 68. Billingsley KJ, Barbosa IA, Bandrés-Ciga S, et al. Mitochondria function associated genes  
800 contribute to Parkinson's Disease risk and later age at onset. *npj Park Dis.* 2019;5(1).  
801 doi:10.1038/s41531-019-0080-x
- 802 69. Kraja AT, Liu C, Fetterman JL, et al. Associations of Mitochondrial and Nuclear Mitochondrial  
803 Variants and Genes with Seven Metabolic Traits. *Am J Hum Genet.* 2019;104(1):112-138.  
804 doi:10.1016/j.ajhg.2018.12.001
- 805 70. Jansen IE, Savage JE, Watanabe K, et al. Genome-wide meta-analysis identifies new loci and  
806 functional pathways influencing Alzheimer's disease risk. *Nat Genet.* 2019;51(3):404-413.  
807 doi:10.1038/s41588-018-0311-9
- 808 71. Pardiñas AF, Holmans P, Pocklington AJ, et al. Common schizophrenia alleles are enriched in  
809 mutation-intolerant genes and in regions under strong background selection. *Nat Genet.*  
810 2018;50(3):381-389. doi:10.1038/s41588-018-0059-2
- 811 72. Maurano MT, Humbert R, Rynes E, et al. Systematic localization of common disease-associated  
812 variation in regulatory DNA. *Science (80- ).* 2012;337(6099):1190-1195.  
813 doi:10.1126/science.1222794
- 814 73. Raule N, Sevini F, Santoro A, Altilia S, Franceschi C. Association studies on human mitochondrial  
815 DNA: Methodological aspects and results in the most common age-related diseases.  
816 *Mitochondrion.* 2007;7(1-2):29-38. doi:10.1016/j.mito.2006.11.013
- 817 74. Yu X, Koczan D, Sulonen AM, et al. mtDNA nt13708A variant increases the risk of multiple  
818 sclerosis. *PLoS One.* 2008;3(2):1-7. doi:10.1371/journal.pone.0001530
- 819 75. Hudson G, Nalls M, Evans JR, et al. Two-stage association study and meta-analysis of

- 820 mitochondrial DNA variants in Parkinson disease. *Neurology*. 2013;80(22):2042-2048.  
821 doi:10.1212/WNL.0b013e318294b434
- 822 76. Samuels DC, Carothers AD, Horton R, Chinnery PF. The power to detect disease associations with  
823 mitochondrial DNA haplogroups. *Am J Hum Genet*. 2006;78(4):713-720. doi:10.1086/502682
- 824 77. Biffi A, Anderson CD, Nalls MA, et al. Principal-Component Analysis for Assessment of Population  
825 Stratification in Mitochondrial Medical Genetics. *Am J Hum Genet*. 2010;86(6):904-917.  
826 doi:10.1016/j.ajhg.2010.05.005
- 827 78. Segrè A V, Consortium D, investigators M, et al. Common Inherited Variation in Mitochondrial  
828 Genes Is Not Enriched for Associations with Type 2 Diabetes or Related Glycemic Traits. *PLoS*  
829 *Genet*. 2010;6(8):e1001058. <https://doi.org/10.1371/journal.pgen.1001058>.
- 830 79. Saxena R, De Bakker PIW, Singer K, et al. Comprehensive association testing of common  
831 mitochondrial DNA variation in metabolic disease. *Am J Hum Genet*. 2006;79(1):54-61.  
832 doi:10.1086/504926
- 833 80. Hudson G, Gomez-Duran A, Wilson IJ, Chinnery PF. Recent Mitochondrial DNA Mutations  
834 Increase the Risk of Developing Common Late-Onset Human Diseases. *PLoS Genet*. 2014;10(5).  
835 doi:10.1371/journal.pgen.1004369
- 836 81. Hudson G, Panoutsopoulou K, Wilson I, et al. No evidence of an association between  
837 mitochondrial DNA variants and osteoarthritis in 7393 cases and 5122 controls. *Ann Rheum Dis*.  
838 2013;72(1):136-139. doi:10.1136/annrheumdis-2012-201932
- 839 82. Seidman JG, Seidman C. Transcription factor haploinsufficiency: When half a loaf is not enough. *J*  
840 *Clin Invest*. 2002;109(4):451-455. doi:10.1172/JCI0215043
- 841 83. Lee R Van Der, Correard S, Wasserman WW. Deregulated Regulators : Disease-Causing cis  
842 Variants in Transcription Factor Genes. *Trends Genet*. 2020;xx(xx). doi:10.1016/j.tig.2020.04.006
- 843 84. Arroyo JD, Jourdain AA, Calvo SE, et al. A Genome-wide CRISPR Death Screen Identifies Genes  
844 Essential for Oxidative Phosphorylation. *Cell Metab*. 2016;24(6):875-885.  
845 doi:10.1016/j.cmet.2016.08.017
- 846 85. Wright S. Physiological and Evolutionary Theories of Dominance. *Am Nat*. 1934;68(714):24.
- 847 86. Kacser H, Burns JA. The molecular basis of dominance. *Genetics*. 1981;97(3-4):639-666.
- 848 87. Chance B, Williams GR. RESPIRATORY ENZYMES IN OXIDATIVE PHOSPHORYLATION: III. THE  
849 STEADY STATE. *J Biol Chem*. 1955;217(1):409-428. <http://www.jbc.org/content/217/1/409.short>.
- 850 88. Vafai SB, Mootha VK. Mitochondrial disorders as windows into an ancient organelle. *Nature*.  
851 2012;491(7424):374-383. doi:10.1038/nature11707
- 852 89. Balaban RS, Kantor HL, Katz LA, Briggs RW. Relation between work and phosphate metabolite in  
853 the in vivo paced mammalian heart. *Science (80- )*. 1986;232(4754):1121-1123.  
854 doi:10.1126/science.3704638
- 855 90. To TL, Cuadros AM, Shah H, et al. A Compendium of Genetic Modifiers of Mitochondrial  
856 Dysfunction Reveals Intra-organelle Buffering. *Cell*. 2019;179(5):1222-1238.e17.  
857 doi:10.1016/j.cell.2019.10.032
- 858 91. Golan D, Lander ES, Rosset S. Measuring missing heritability: Inferring the contribution of  
859 common variants. *Proc Natl Acad Sci U S A*. 2014;111(49):E5272-E5281.  
860 doi:10.1073/pnas.1419064111
- 861 92. Polderman TJC, Benyamin B, De Leeuw CA, et al. Meta-analysis of the heritability of human traits  
862 based on fifty years of twin studies. *Nat Genet*. 2015;47(7):702-709. doi:10.1038/ng.3285
- 863 93. Fuchsberger C, Flannick J, Teslovich TM, et al. The genetic architecture of type 2 diabetes.  
864 *Nature*. 2016;536(7614):41-47. doi:10.1038/nature18642
- 865 94. Hill WG, Goddard ME, Visscher PM. Data and theory point to mainly additive genetic variance for  
866 complex traits. *PLoS Genet*. 2008;4(2). doi:10.1371/journal.pgen.1000008
- 867 95. Zhu Z, Bakshi A, Vinkhuyzen AAE, et al. Dominance genetic variation contributes little to the

- 868 missing heritability for human complex traits. *Am J Hum Genet.* 2015;96(3):377-385.  
869 doi:10.1016/j.ajhg.2015.01.001
- 870 96. Rand DM, Mossman JA. Mitonuclear conflict and cooperation govern the integration of  
871 genotypes, phenotypes and environments. *Philos Trans R Soc B Biol Sci.* 2020;375(1790).  
872 doi:10.1098/rstb.2019.0188
- 873 97. Sackton TB, Hartl DL. Genotypic Context and Epistasis in Individuals and Populations. *Cell.*  
874 2016;166(2):279-287. doi:10.1016/j.cell.2016.06.047
- 875 98. Hemani G, Shakhbazov K, Westra HJ, et al. Detection and replication of epistasis influencing  
876 transcription in humans. *Nature.* 2014;508(7495):249-253. doi:10.1038/nature13005
- 877 99. Solenski NJ, DiPierro CG, Trimmer PA, Kwan AL, Helms GA. Ultrastructural changes of neuronal  
878 mitochondria after transient and permanent cerebral ischemia. *Stroke.* 2002;33(3):816-824.  
879 doi:10.1161/hs0302.104541
- 880 100. Flameng W, Andres J, Ferdinande P, Mattheussen M, Van Belle H. Mitochondrial function in  
881 myocardial stunning. *J Mol Cell Cardiol.* 1991;23(1):1-11. doi:10.1016/0022-2828(91)90034-J
- 882 101. Weinbrenner C, Liu GS, Downey JM, Cohen M V. Cyclosporine a limits myocardial infarct size  
883 even when administered after onset of ischemia. *Cardiovasc Res.* 1998;38(3):676-684.  
884 doi:10.1016/S0008-6363(98)00064-9
- 885 102. Kubben N, Misteli T. Shared molecular and cellular mechanisms of premature ageing and ageing-  
886 associated diseases. *Nat Rev Mol Cell Biol.* 2017;18(10):595-609. doi:10.1038/nrm.2017.68
- 887 103. Garcia CK, Wright WE, Shay JW. Human diseases of telomerase dysfunction: Insights into tissue  
888 aging. *Nucleic Acids Res.* 2007;35(22):7406-7416. doi:10.1093/nar/gkm644
- 889 104. Han S, Brunet A. Histone methylation makes its mark on longevity. *Trends Cell Biol.*  
890 2012;22(1):42-49. doi:10.1016/j.tcb.2011.11.001
- 891 105. Bahar R, Hartmann CH, Rodriguez KA, et al. Increased cell-to-cell variation in gene expression in  
892 ageing mouse heart. *Nature.* 2006;441(7096):1011-1014. doi:10.1038/nature04844
- 893 106. Kanfi Y, Naiman S, Amir G, et al. The sirtuin SIRT6 regulates lifespan in male mice. *Nature.*  
894 2012;483(7388):218-221. doi:10.1038/nature10815
- 895 107. Karczewski KJ, Dudley JT, Kukurba KR, et al. Systematic functional regulatory assessment of  
896 disease-associated variants. *Proc Natl Acad Sci U S A.* 2013;110(23):9607-9612.  
897 doi:10.1073/pnas.1219099110
- 898 108. Purcell S, Neale B, Todd-Brown K, et al. PLINK: A tool set for whole-genome association and  
899 population-based linkage analyses. *Am J Hum Genet.* 2007;81(3):559-575. doi:10.1086/519795
- 900 109. Yanai I, Benjamin H, Shmoish M, et al. Genome-wide midrange transcription profiles reveal  
901 expression level relationships in human tissue specification. *Bioinformatics.* 2005;21(5):650-659.  
902 doi:10.1093/bioinformatics/bti042
- 903 110. Melé M, Ferreira PG, Reverter F, et al. The human transcriptome across tissues and individuals.  
904 *Science (80- ).* 2015;348(6235):660-665. <http://dx.doi.org/10.1126/science.aaa0355>.
- 905 111. Morris JA, Randall JC, Maller JB, Barrett JC. Evoker: A visualization tool for genotype intensity  
906 data. *Bioinformatics.* 2010;26(14):1786-1787. doi:10.1093/bioinformatics/btq280
- 907 112. Yates AD, Achuthan P, Akanni W, et al. Ensembl 2020. *Nucleic Acids Res.* 2020;48(D1):D682-D688.  
908 doi:10.1093/nar/gkz966
- 909 113. Litman T, Stein WD. Obtaining estimates for the ages of all the protein-coding genes and most of  
910 the ontology-identified noncoding genes of the human genome, assigned to 19 phylostrata.  
911 *Semin Oncol.* 2019;46(1):3-9. doi:10.1053/j.seminoncol.2018.11.002
- 912 114. Orho-Melander M, Melander O, Guiducci C, et al. Common missense variant in the glucokinase  
913 regulatory protein gene is associated with increased plasma triglyceride and C-reactive protein  
914 but lower fasting glucose concentrations. *Diabetes.* 2008;57(11):3112-3121. doi:10.2337/db08-  
915 0516



- 916 115. Krebs HA. The redox state of nicotinamide adenine dinucleotide in the cytoplasm and  
917 mitochondria of rat liver. *Adv Enzyme Regul.* 1967;5(C):409-434. doi:10.1016/0065-  
918 2571(67)90029-5
- 919 116. Goodman RP, Markhard AL, Shah H, et al. Hepatic NADH reductive stress underlies common  
920 variation in metabolic traits. *Nature.* 2020;583(7814):122-126. doi:10.1038/s41586-020-2337-2
- 921 117. Howrigan D, Abbot L, Churchhouse C, Palmer DS. Details and considerations of the UK Biobank  
922 GWAS. Neale lab blog. [http://www.nealelab.is/blog/2017/9/11/details-and-considerations-of-](http://www.nealelab.is/blog/2017/9/11/details-and-considerations-of-the-uk-biobank-gwas)  
923 [the-uk-biobank-gwas](http://www.nealelab.is/blog/2017/9/11/details-and-considerations-of-the-uk-biobank-gwas). Published 2017.
- 924 118. Nguyen M, Wong YC, Ysselstein D, Severino A, Krainc D. Synaptic, Mitochondrial, and Lysosomal  
925 Dysfunction in Parkinson's Disease. *Trends Neurosci.* 2019;42(2):140-149.  
926 doi:10.1016/j.tins.2018.11.001
- 927 119. Grünewald A, Kumar KR, Sue CM. New insights into the complex role of mitochondria in  
928 Parkinson's disease. *Prog Neurobiol.* 2019;177(April 2018):73-93.  
929 doi:10.1016/j.pneurobio.2018.09.003
- 930 120. Abou-Sleiman PM, Muqit MMK, Wood NW. Expanding insights of mitochondrial dysfunction in  
931 Parkinson's disease. *Nat Rev Neurosci.* 2006;7(3):207-219. doi:10.1038/nrn1868
- 932 121. Ge P, Dawson VL, Dawson TM. PINK1 and Parkin mitochondrial quality control: A source of  
933 regional vulnerability in Parkinson's disease. *Mol Neurodegener.* 2020;15(1):1-18.  
934 doi:10.1186/s13024-020-00367-7
- 935 122. Bose A, Beal MF. Mitochondrial dysfunction in Parkinson's disease. *J Neurochem.* 2016;139:216-  
936 231. doi:10.1111/jnc.13731
- 937 123. Müller-Nedebock AC, Brennan RR, Venter M, et al. The unresolved role of mitochondrial DNA in  
938 Parkinson's disease: An overview of published studies, their limitations, and future prospects.  
939 *Neurochem Int.* 2019;129(April):104495. doi:10.1016/j.neuint.2019.104495  
940
